1 **Ancestral absence of electron transport chains in Patescibacteria and DPANN**

2

3 Jacob P. Beam<sup>1</sup>, Eric D. Becraft<sup>1,15</sup>, Julia M. Brown<sup>1</sup>, Frederik Schulz<sup>2</sup>, Jessica K. Jarett<sup>2,16</sup>,

4 Oliver Bezuidt<sup>1</sup>, Nicole J. Poulton<sup>1</sup>, Kayla Clark<sup>1,17</sup>, Peter F. Dunfield<sup>3</sup>, Nikolai V. Ravin<sup>4</sup>, John

5 R. Spear<sup>5</sup>, Brian P. Hedlund<sup>6</sup>, Konstantinos A. Kormas<sup>7</sup>, Stefan M. Sievert<sup>8</sup>, Mostafa S.

6 Elshahed<sup>9</sup>, Hazel A. Barton<sup>10</sup>, Matthew B. Stott<sup>11</sup>, Jonathan A. Eisen<sup>12</sup>, Duane P. Moser<sup>13</sup>, Tullis

7 C. Onstott<sup>14</sup>, Tanja Woyke<sup>2</sup>, and Ramunas Stepanauskas<sup>1\*</sup>

8

9 <sup>1</sup>Bigelow Laboratory for Ocean Sciences, East Boothbay, Maine, USA, 04544

10 <sup>2</sup>Department of Energy Joint Genome Institute, Walnut Creek, California, USA, 94598

11 <sup>3</sup>University of Calgary, Calgary, AB, Canada, T2N 1N4

12 <sup>4</sup>Institute of Bioengineering, Research Center of Biotechnology of the Russian Academy of  
13 Sciences, Moscow, 119071, Russia

14 <sup>5</sup>Civil and Environmental Engineering, Colorado School of Mines, Golden, Colorado 80401

15 <sup>6</sup>School of Life Sciences, University of Nevada Las Vegas, Las Vegas, NV, 89154, USA.

16 Nevada Institute of Personalized Medicine, University of Nevada Las Vegas, Las Vegas, NV,  
17 USA, 89154

18 <sup>7</sup>Department of Ichthyology and Aquatic Environment, University of Thessaly, 38446, Volos,  
19 Greece

20 <sup>8</sup>Biology Department, Woods Hole Oceanographic Institution, Woods Hole, MA, USA, 02543

21 <sup>9</sup>Department of Microbiology and Molecular Genetics, Oklahoma State University, Stillwater,  
22 Oklahoma, USA

23 <sup>10</sup>Department of Biology, University of Akron, Akron, OH 44325

24 <sup>11</sup>School of Biological Sciences, University of Canterbury, Christchurch, 8041 New Zealand.

25 <sup>12</sup>University of California Davis, Davis, CA, USA, 95616

26 <sup>13</sup>Desert Research Institute, Las Vegas, Nevada, USA, 89119

27 <sup>14</sup>Princeton University, Princeton, New Jersey, USA, 08544

28 Current address:

29 <sup>15</sup>University of North Alabama, Florence, AL, USA, 35632

30 <sup>16</sup>AnimalBiome, Oakland, CA, USA, 94609

31 <sup>17</sup>U.S. Army Engineer Research and Development Center, US Army Corp of Engineers,

32 Vicksburg, Mississippi, 39180

33

34 \*To whom correspondence should be addressed: [rstepanauskas@bigelow.org](mailto:rstepanauskas@bigelow.org)

35

36

37

38

39

40

41

42

43

44

45

46

47 **Abstract**

48           Recent discoveries suggest that the candidate superphyla Patescibacteria and DPANN  
49 constitute a large fraction of the phylogenetic diversity of Bacteria and Archaea. Their small  
50 genomes and limited coding potential have been hypothesized to be ancestral adaptations to  
51 obligate symbiotic lifestyles. To test this hypothesis, we performed cell-cell association,  
52 genomic, and phylogenetic analyses on 4,829 individual cells of Bacteria and Archaea from 46  
53 globally distributed surface and subsurface field samples. This confirmed the ubiquity and  
54 abundance of Patescibacteria and DPANN in subsurface environments, the small size of their  
55 genomes and cells, and the divergence of their gene content from other Bacteria and Archaea.  
56 Our analyses suggest that most Patescibacteria and DPANN in the studied subsurface  
57 environments do not form specific physical associations with other microorganisms. These data  
58 also suggest that their unusual genomic features and prevalent auxotrophies may be a result of  
59 minimal cellular energy transduction mechanisms that potentially precede the evolution of  
60 respiration, thus relying solely on fermentation for energy conservation.

61

62

63

64 Keywords: Bacteria, Archaea, evolution, single amplified genome, energy, auxotrophy,  
65 symbiosis, electron transport chain, fermentation, respiration, oxidoreductases

66

67

68

69

## 70 **Introduction**

71 Cultivation-independent research tools have revealed the coding potential of numerous,  
72 deep branches of Bacteria and Archaea that were unknown until recently (Wrighton et al., 2012;  
73 Rinke et al., 2013; Brown et al., 2015; Castelle et al., 2015) Among them, the candidate bacterial  
74 superphylum Patescibacteria (also known as Candidate Phyla Radiation, CPR) and archaeal  
75 superphylum DPANN have garnered particular attention, as they appear to constitute a large  
76 fraction of microbial diversity in subsurface and various other environments (Brown et al., 2015;  
77 Hug et al., 2016; Dombrowski et al., 2019). Patescibacteria and DPANN are characterized by  
78 small genomes and cell sizes, and predicted minimal biosynthetic and metabolic potential  
79 (Wrighton et al., 2012; Luef et al., 2015; Castelle and Banfield, 2018). They also appear to have  
80 slow metabolism, as indicated by low per-cell ribosome counts (Luef et al., 2015) and slow  
81 estimated genome replication rates (Brown et al., 2016). Host-dependent endo- and ecto-  
82 symbioses have been observed in several Patescibacteria (Gong et al., 2014; He et al., 2015;  
83 Cross et al., 2019) and the Nanoarchaeota and Nanohaloarchaeota phyla within DPANN (Huber  
84 et al., 2002; Podar et al., 2013; Munson-McGee et al., 2015; Jarett et al., 2018; Hamm et al.,  
85 2019). As a result, it has been posited that the unusual biological features of Patescibacteria and  
86 DPANN reflect ancestral adaptations to symbiotic lifestyles (Castelle et al., 2018; Dombrowski  
87 et al., 2019). However, direct evidence of symbiosis in Patescibacteria and DPANN is limited to  
88 a small number of narrow phylogenetic groups inhabiting surface environments and, in the case  
89 of Patescibacteria, dependent on eukaryotic hosts (Gong et al., 2014) or eukaryotic host systems  
90 (He et al., 2015; Cross et al., 2019) (i.e., mammalian oral cavities), which suggests relatively  
91 recent adaptations.

92           Here, we performed physical cell-cell association, genomic, and phylogenetic analyses on  
93 4,829 of individual microbial cells from 46 globally distributed and environmentally diverse  
94 locations to gain additional insights into the unusual biological features of Patescibacteria and  
95 DPANN. Consistent with prior reports, we found these two superphyla abundant in many  
96 subsurface environments, and also confirm their consistently small cell and genome sizes. Our  
97 single cell genomic and biophysical observations do not support the prevailing view that  
98 Patescibacteria and DPANN are dominated by symbionts (Castelle et al., 2018; Dombrowski et  
99 al., 2019). Instead, based on the apparent lack of genes for complete electron transport systems,  
100 we hypothesize that these two superphyla have not evolved the capacity for respiration and  
101 therefore rely on fermentative metabolisms for energy conservation. Although complex  
102 metabolic interdependencies are a rule rather than exception in natural microbiomes (Zengler and  
103 Zaramela, 2018), the predicted fermentative energy conservation and limited biosynthetic  
104 potential (Castelle et al., 2018; Dombrowski et al., 2019) of Patescibacteria and DPANN may  
105 define a highly communal lifestyle of these two superphyla and provide explanation for the  
106 extreme difficulty in obtaining them in pure culture.

107

## 108 **Materials and Methods**

109

### 110 Field sample collection

111           Field samples were collected from a global set of diverse environments that were found  
112 to contain candidate phyla of Bacteria and Archaea in prior studies (Rinke et al., 2013; Thomas  
113 et al., 2013; Moser et al., 2015; Becraft et al., 2017; Hershey et al., 2018; Sackett, 2018; Sackett  
114 et al., 2018, 2019). Immediately after collection, samples were amended with sterile 5% glycerol

115 and 1 mM EDTA (final concentrations) and stored at -80 °C. Field sample metadata is located  
116 with each individual SAG in Table S1.

117

### 118 Single amplified genome (SAG) generation, sequencing, and *de novo* assembly

119 SAG generation and sequencing were performed by Bigelow Laboratory for Ocean Sciences  
120 Single Cell Genomics Center (SCGC) and U.S. Department of Energy Joint Genome Institute  
121 (JGI) (Table S1). At SCGC, field samples were stained with SYTO-9 nucleic acids stain  
122 (Thermo Fisher Scientific), separated using fluorescence-activated cell sorting (FACS), lysed  
123 using a combination of freeze-thaw and alkaline treatment, and their genomic DNA was  
124 amplified using WGA-X in a cleanroom, as previously described (Stepanauskas et al., 2017). For  
125 sorting of cells with active oxidoreductases, the Beatrix field sample (plate AG-274) was pre-  
126 incubated with the RedoxSensor Green stain (Thermo Fisher Scientific) following  
127 manufacturer's instructions. During cell sorting, cell size estimates were performed using  
128 calibrated index FACS (Stepanauskas et al., 2017). All SAGs generated at SCGC were subject to  
129 Low Coverage Sequencing (LoCoS) using a modified Nextera library preparation protocol and  
130 NextSeq 500 (Illumina) sequencing instrumentation (Stepanauskas et al., 2017). This resulted in  
131 a variable number of 2x150bp reads per SAG, with an average of ~300k. The reads were *de novo*  
132 assembled using a customized workflow utilizing SPAdes (Bankevich et al., 2012), as previously  
133 described (Stepanauskas et al., 2017). The quality of the sequencing reads was assessed using  
134 FastQC and the quality of the assembled genomes (contamination and completeness) was  
135 assessed using checkM (Parks et al., 2015) and tetramer frequency analysis (Woyke et al., 2009).  
136 This SAG generation, sequencing and assembly workflow was previously evaluated for  
137 assembly errors using three bacterial benchmark cultures with diverse genome complexity and

138 GC content (%), indicating no non-target and undefined bases in the assemblies and average  
139 frequencies of mis-assemblies, indels and mismatches per 100 kbp being 1.5, 3.0 and 5.0  
140 (Stepanuskas et al., 2017). Functional annotation was first performed using Prokka (Seemann,  
141 2014) with default Swiss-Prot databases supplied by the software. Prokka was run a second time  
142 with a custom protein annotation database built from compiling Swiss-Prot (Bateman et al.,  
143 2017) entries for Archaea and Bacteria. The uniquely barcoded sequencing libraries of SAGs  
144 belonging to candidate divisions were combined, in equal proportions, into 48-library pools and  
145 shipped to JGI for deeper sequencing with NextSeq 500 (Illumina) in 2x150 bp mode. Quality  
146 filtering of raw reads was performed with BBTools v.37, read normalization with BBNorm, and  
147 error correction with Tadpole (<http://bbtools.jgi.doe.gov>). The resulting reads were assembled  
148 with SPAdes (Nurk et al., 2013) (v3.9.0, --phred-offset 33 -sc -k 22,55,95 -12), and 200 bp was  
149 trimmed from the ends of assembled contigs, after which contigs with read coverage < 2 or < 2  
150 kbp in length were discarded. Assemblies were annotated according to IMG standard protocols  
151 (Huntemann et al., 2016; Chen et al., 2019). All SAGs are publicly available in IMG/M (Chen et  
152 al., 2019), and can be found under their GOLD analysis project identifiers in Table S1.

153

#### 154 Identification of heterogenous DNA sources

155 The 16S ribosomal RNA gene was identified in SAGs by searching them individually  
156 using cmsearch, which is part of the infernal package (Nawrocki and Eddy, 2013), using the  
157 bacterial 16S rRNA Rfam covariance model ([rfam.xfam.org/family/RF00177](http://rfam.xfam.org/family/RF00177)). This method is  
158 particularly helpful in predicting 16S rRNA genes in Patescibacteria and DPANN, which can  
159 often have introns in their 16S rRNA genes (Brown, 2015). Taxonomic assignments to these 16S  
160 rRNA genes were conducted using “classify.seqs” within mothur (Schloss et al., 2009) version

161 1.41.3 against the Silva 132 reference database and taxonomy file (Quast et al., 2013). The  
162 resulting taxonomy file was used to search for SAGs that contained two 16S rRNA genes that  
163 had different taxonomic phylum-level assignments and were marked as putative co-sorts; those  
164 that did not have two 16S rRNA genes were marked as single sorts. The checkM (Parks et al.,  
165 2015) contamination estimates were used to determine SAGs that had high values of potential  
166 genome admixture (e.g., two different cellular origins). A Chi-squared test was performed in R  
167 using the “chisq.test” function on potential co-sorted and single sorted SAGs, and Pearson’s  
168 residuals were retrieved from the output of this test and used to calculate the percent contribution  
169 to each  $X^2$  statistic, and plotted using the “corrplot” package in R Studio.

170

#### 171 Genomes from prior studies

172 A total of 1,025 publicly available SAGs, metagenome bins, and isolate genomes (Table  
173 S2) were used in this study from the Integrated Microbial Genomes and Microbiomes (IMG/M)  
174 database (Chen et al., 2019) (genomes accessed April 2018). These genomes were selected by  
175 clustering the RNA polymerase COG0086 protein sequence at 70% identity, and if there were  
176 similar genomes at the 70% identity threshold, the one with the most complete set of 56 single  
177 copy proteins was chosen as representative. Phylum-level classification and symbiotic lifestyle  
178 assignments were exported from IMG/M. In cases where IMG/M lacked lifestyle assignments,  
179 manual literature searches of organism names were used to determine whether they have  
180 documented symbiotic relationships.

181

182

183



184 Concatenated single copy protein phylogeny

185 A set of 56 universal single copy marker proteins (Eloe-Fadrosh et al., 2016; Yu et al.,  
186 2017) was used to build a phylogenetic tree for the newly generated SAGs and MAGs and a  
187 representative set of bacteria and archaea based on publicly available microbial genomes in  
188 IMG/M (Chen et al., 2019) (genomes accessed in April 2018). Marker proteins were identified  
189 with hmmsearch (Eddy, 2011) version 3.1b2, using a specific Hidden Markov Model for each of  
190 the markers. Genomes for which 5 or more different marker proteins could be identified were  
191 included in the tree. For every marker protein, alignments were built with MAFFT (Nakamura et  
192 al., 2018) v7.294b and subsequently trimmed with BMGE (Criscuolo and Gribaldo, 2010) v1.12  
193 using BLOSUM30. Single protein alignments were concatenated and maximum likelihood  
194 phylogenies inferred with FastTree2 (Price et al., 2010) using the options: -spr 4 -mlacc 2 -  
195 slownni -lg (for archaea) and -spr 4 -mlacc 2 -slownni -lg (for bacteria).

196

197 Clusters of orthologous groups principal components analysis

198 Clusters of orthologous groups (COGs) were assigned to SAG (Table S1) and reference  
199 genome (Table S2) predicted protein sequences using reverse position-specific blast (rpsblast)  
200 (Altschul et al., 1997) with an e-value cutoff of 1e-5 and the cdd2cog script  
201 (<https://github.com/aleimba/bac-genomics-scripts/tree/master/cdd2cog>). Genomes that were used  
202 for the principal component analysis (PCA) had completeness estimates greater than or equal to  
203 30%, and contained 16S rRNA genes for unambiguous phylum-level classification. Eigenvector  
204 values were calculated in RStudio (RStudio Team, 2016) version 1.1.463 using the cmdscale  
205 function from relative abundances of the different COG categories expressed as a percent out of  
206 the total number of assigned COGs. PCA plots were visualized with ggplot2 (Wickham, 2016) in

207 RStudio (RStudio Team, 2016). A Wilcoxon test was performed in RStudio using the  
208 “wilcox.test” function to determine statistical differences between principal components among  
209 the different clusters discussed in the main text. The color scheme for these plots is based on the  
210 Color Universal Design (<https://jfly.uni-koeln.de/color/>), and should be distinguishable by all  
211 types of vision. This color scheme was used throughout all the figures in the manuscript.

212

### 213 Coding sequence density

214 Coding sequences (CDS) for SAGs and reference genomes were predicted using Prodigal  
215 (Hyatt et al., 2010) version 2.6.3. The initial analysis of prokka CDS density revealed that  
216 numerous SAGs and reference genomes had very low coding densities. Prokka utilizes the code  
217 11 translation table by default, and many of these genomes could potentially use stop codons in  
218 place of canonical codons (Wrighton et al., 2012; Rinke et al., 2013). We determined the correct  
219 translation table to utilize for each genome by comparing the total CDS length from Code 11 and  
220 Code 25 predictions, and if the Code 11 total CDS length was greater than the Code 25 total  
221 CDS length, then the total length from Code 11 was used in the coding density calculation. If the  
222 opposite was true, then the Code 25 total CDS length was used. The coding density was  
223 calculated by dividing the total CDS sequence by the total assembly size.

224

### 225 Oxygen reductase identification

226 A published heme copper oxidase subunit I database (Sousa et al., 2011) from bacteria  
227 and archaea was used as a database with blastp (Altschul et al., 1990) with an e-value cutoff of  
228 1e-10 using the SAG and reference genomes as queries. The original database file had to be de-  
229 replicated (i.e., removing 100% identical sequences) using the dedupe.sh script, which is part of

230 the BMap package (<https://github.com/BioInfoTools/BMap>). The sole crystal structure  
231 sequence for the bd-ubiquinol oxidase subunit A from *Geobacillus thermodentrificans* (Safarian  
232 et al., 2016) was used as a database for a blastp (Altschul et al., 1990) search using the SAGs and  
233 reference genomes as queries with an e-value cutoff of 1e-10.

234

### 235 Oxygen reductase horizontal gene transfer

236 The protein sequences identified from the above section were retrieved from SAGs using  
237 the grep function from the list of sequence file headers from the above analysis in the SeqKit  
238 package (Shen et al., 2016). Reference protein sequences for Patescibacteria were retrieved via  
239 the blastp server using the Patescibacteria SAG HCO sequences as queries and selecting for hits  
240 only from sequences that were assigned to Patescibacteria and/or Candidate Phyla Radiation.  
241 Other reference sequences for Patescibacteria were retrieved by manual literature searches from  
242 relevant studies (Nelson and Stegen, 2015; León-Zayas et al., 2017; Castelle et al., 2018). The  
243 search for Patescibacteria HCOs revealed that they only encoded for the low-affinity Type A  
244 HCO, and all subsequent phylogenetic analyses focused solely on this HCO type. The multi-fasta  
245 file containing all HCO sequences was filtered for sequences that were greater than 400 amino  
246 acids in length, and aligned with mafft (Nakamura et al., 2018) using the "--auto" option and the  
247 resulting alignment was trimmed with trimal (Capella-Gutiérrez et al., 2009) to remove gaps  
248 using the "--gappyout" option. A maximum likelihood phylogenetic tree was created using  
249 FastTree (Price et al., 2010) using the LG model of amino acid evolution. No DPANN genome  
250 to date has had a positive identification of an HCO subunit I. The methodology for the HCO  
251 phylogeny was repeated for the bd-ubiquinol oxygen reductases. Phylogenetic trees were  
252 visualized and annotated using the online Interactive Tree of Life tool (Letunic and Bork, 2019).

253

#### 254 Oxidoreductase annotation and abundance

255 Enzyme Commission 1 (EC1) class family proteins (i.e., oxidoreductases) were predicted from  
256 the SAGs and reference genomes using the prokka “genome.tsv” annotation files. The total  
257 number of predicted protein sequences annotated as EC1 for each genome was divided by the  
258 total number of predicted protein sequences to provide the percent of protein encoding genes that  
259 were predicted to be oxidoreductases. This allows for a direct comparison of all the genomes that  
260 exhibited wide ranges in completeness estimates.

261

#### 262 KEGG orthology assignment of electron transport chain proteins

263 The Kyoto Encyclopedia of Gene and Genomes (KEGG) orthology (KO) annotations were  
264 assigned using KofamKOALA (Aramaki et al., 2019), which uses hmmsearch (Eddy, 2011)  
265 against curated hidden Markov model (HMM) KO profiles. Only KO profiles related to energy  
266 transduction oxidoreductases were used to search the genomes in this study, which were  
267 extracted from Supplemental Table 1 in Jelen et al. (2016). Sequences were identified as positive  
268 hits if their score was greater than or equal to 50% of the sequence threshold value as calculated  
269 in KofamKOALA.

270

#### 271 16S ribosomal RNA gene phylogeny

272 16S rRNA gene sequences predicted using cmsearch (Nawrocki and Eddy, 2013) were  
273 filtered for sequences that were greater than or equal to 1200 bp using bioawk  
274 (<https://github.com/lh3/bioawk>). Sequences that were 100% identical were removed using  
275 dedupe.sh (<https://github.com/BioInfoTools/BBMap>). Sequences were then aligned using ssu-

276 align (Nawrocki, 2009), which produces two separate alignment files for Bacteria and Archaea.  
277 Next, ambiguously aligned positions were removed using ssu-mask, and sequences were re-  
278 checked to ensure that the masked alignment contained sequences that were greater than or equal  
279 to 1200 bp. Sequences that did not meet these threshold requirements were removed from the  
280 alignment file using ssu-mask with the “--seq-r” option and list of sequences to remove. The  
281 Stockholm alignment file was converted to an aligned fasta file using ssu-mask with the “--  
282 stk2afa” option. The masked and filtered alignment files for Bacteria and Archaea were used to  
283 create phylogenetic trees using maximum likelihood reconstruction with FastTree (Price et al.,  
284 2010) with the following parameters: “-nt -gtr -cat 20 -gamma”. Both trees were visualized and  
285 annotated using the Interactive Tree of Life (Letunic and Bork, 2019).

286

## 287 **Results and Discussion**

288

### 289 Global presence of Patescibacteria and DPANN in subsurface environments

290 To improve our understanding of the deep genealogy of Bacteria and Archaea, we  
291 sequenced 4,829 single amplified genomes (SAGs; Table S1) of previously under-sampled  
292 microbial lineages from 46 globally distributed field sites (Figure 1; Table S1). These sites were  
293 chosen based on 16S rRNA gene amplicon screens that were enriched in bacterial and archaeal  
294 candidate phyla. A maximum likelihood phylogenetic tree of concatenated single-copy proteins  
295 (SCP) (Figure 2) positioned 22% and 4% of SAGs within Patescibacteria (n=492) and DPANN  
296 archaea (n=81). The concatenated SCP phylogenetic tree revealed the separation of  
297 Patescibacteria and DPANN from other Bacteria and Archaea, respectively, which corroborates  
298 other phylogenetic reconstructions using diverse sets of single copy proteins and phylogenetic

299 tools (Rinke et al., 2013; Brown et al., 2015; Hug et al., 2016; Williams et al., 2017; Castelle et  
300 al., 2018; Dombrowski et al., 2019). Patescibacteria comprised a median relative abundance of  
301 13% (range=0-81%) and DPANN comprised a median abundance of 7.5% (range=0-23%) in 33  
302 analyzed environmental sites, with elevated abundances in deep-sourced aquifer environments  
303 (Figure 3). Most of the Patescibacteria and DPANN SAGs originated from 13 continental  
304 subsurface sites in Africa, Asia, and North America (Table S1). These results confirm that  
305 Patescibacteria and DPANN are globally abundant members of subsurface microbial  
306 communities, expanding on the prior genomic studies that were predominantly based on a small  
307 number of study locations in North America (Rinke et al., 2013; Luef et al., 2015; Castelle et al.,  
308 2018).

309

#### 310 Evidence for physical cell-cell associations

311 We searched for evidence of physical cell-cell associations—an implication of obligate  
312 symbiosis—by identifying genomic sequences from multiple phylogenetically distinct organisms  
313 within individual SAGs. First, we searched for multiple copies of conserved, single copy protein-  
314 encoding genes using checkM (Parks et al., 2015), which is a commonly used tool to detect  
315 genome contamination. This approach identified 1% of Patescibacteria SAGs (5/492), 1.2% of  
316 DPANN SAGs (1/81), and 0.3% of SAGs from other phyla (5/1686) as containing DNA from  
317 heterogeneous sources (Table S3). Next, we searched for non-identical, near-full-length (> 1,000  
318 bp) 16S rRNA genes in individual SAG assemblies. Such cases accounted for 1.5% of  
319 Patescibacteria (4/262), 0% DPANN (0/56), and 0.53% for other phyla (4/758) (Table S3). A  
320 Chi-square test revealed that there was a significant relationship between phyla and potential co-  
321 sorted SAGs from both checkM (p-value= $1.2 \times 10^{-13}$ ;  $X^2=224.2$ ) and 16S rRNA gene analyses

322 (p-value <math>2.2 \times 10^{-16}</math>;  $X^2=238.07$ ), but the overall contribution of Patescibacteria and DPANN to  
323 the significance of co-sorted SAGs was very low (<math>0.5\%</math>) relative to other phyla (Figure 4). Due  
324 to the incomplete SAG assemblies (Table S1), these sequencing-based approaches may  
325 underestimate the overall frequency of cell-cell associations in our data set. However, they  
326 consistently show that putative cell-cell associations constitute only a minor fraction of all SAGs,  
327 and that Patescibacteria and DPANN are not significantly enriched in such associations relative  
328 to other phyla in the studied environments. Furthermore, all identified cases of heterogeneous  
329 DNA in SAG assemblies were phylogenetically unique (Table S3), in contrast to the recurring  
330 Nanoarchaeota-Crenarchaeota symbiotic associations found using the same techniques in hot  
331 springs in prior studies (Munson-McGee et al., 2015; Jarett et al., 2018). Also, in mammalian  
332 oral microbiomes, Saccharibacteria have been shown to be specifically associated with  
333 Actinobacteria hosts (He et al., 2015; Cross et al., 2019). This suggests that the infrequent and  
334 inconsistent presence of taxonomically heterogeneous DNA in SAGs most likely originated from  
335 non-specific aggregation of multiple cells and/or attachment of extracellular DNA.

336       Based on a small number of transmission electron micrograph observations, it has been  
337 suggested that Patescibacteria associations with other microorganisms may be fragile (Luef et al.,  
338 2015). Thus, we cannot rule out the possibility that some Patescibacteria and DPANN cells were  
339 attached to host cells *in situ* and became detached during sample collection and processing. To  
340 reduce the risk of dispersing natural cell aggregates and associations, we performed only a gentle  
341 mixing of the analyzed samples in preparation for cell sorting. In prior studies, similar techniques  
342 successfully revealed host-symbiont associations in termite guts (Hongoh et al., 2008), marine  
343 plankton (Martinez-Garcia et al., 2012) and hot springs (Jarett et al., 2018). This approach was  
344 also used to determine symbiotic associations between anaerobic methane-oxidizing archaea and

345 their syntrophic partners in natural consortia from methane seeps (Hatzenpichler et al., 2016). It  
346 is worthy to note that the Saccharibacteria-Actinobacteria symbiont-host relationship was only  
347 disrupted by physical passage through a narrow-gauge needle multiple times (He et al., 2015).  
348 Also, putatively co-sorted SAGs of Nanoarchaeota and Crenarchaeota from iron oxide microbial  
349 mats were treated by a repeated physical disruption through multiple wash cycles and density  
350 gradient centrifugation, from which co-sorted cells were obtained (Jarett et al., 2018). Thus,  
351 although the techniques applied here may underestimate the overall counts of cell-cell  
352 associations *in situ*, we found no evidence for Patescibacteria and DPANN to be enriched in such  
353 associations relative to other phyla, and to form lineage-specific associations in the analyzed  
354 environments.

355

### 356 Cell diameters

357 We employed calibrated index fluorescence-activated cell sorting (FACS) to determine  
358 physical diameters of individual cells that were used in SAG generation (Stepanauskas et al.,  
359 2017). This indicated that Patescibacteria (n=273) and DPANN (n=29) cells are extremely small  
360 across their entire phylogenetic breadth, with median estimated diameters of 0.2  $\mu\text{m}$  (Figure 5).  
361 Several cases of larger, outlier diameter estimates may be due to attachment to other cells and  
362 particles, cellular division, methodological artifacts, or true biological variation. The low  
363 frequency of Patescibacteria and DPANN DNA recovery from larger particles (Table S1; Figure  
364 5) provides further indication that most of these cells are not attached to other microorganisms.  
365 Likewise, most of the SAGs with identified heterogeneous genome sources were larger than their  
366 phylum median cell diameters (Table S3), which is consistent with their aggregation with other  
367 cells.



368 To further investigate the composition of extremely small cells, we generated a  
369 complementary library of SAGs from a single subsurface sample (AG-274; Table S1) with a  
370 FACS gate targeting only  $\leq 0.3 \mu\text{m}$  particles. Confirming our expectations,  $>90\%$  of SAGs in this  
371 cell diameter-specific library were composed of Patescibacteria and DPANN (Figure 3). The  
372 obtained cellular size ranges are consistent with a prior report, which was based on transmission  
373 electron micrographs from one field study site (Luef et al., 2015). These cell diameters  
374 approximate the lower theoretical limits for cellular life (Maniloff et al., 1997).

375

### 376 General genome features

377 To identify functional coding potential differences of Patescibacteria and DPANN  
378 compared to other Bacteria and Archaea, we performed a principal component analysis (PCA)  
379 using the relative abundance of clusters of orthologous groups (COG) as input variables with  
380 SAGs that had at least 30% completeness and a near full-length 16S rRNA gene (Figure 6). This  
381 showed a clear separation of Patescibacteria and DPANN from other bacteria and archaea along  
382 the first component (PC1) (Wilcoxon signed-rank test;  $p\text{-value} < 2.2 \times 10^{-16}$ ). Importantly, well-  
383 described symbionts (Table S4) separated from both Patescibacteria along PC1 and DPANN  
384 along PC2 ( $p\text{-value} = 2.57 \times 10^{-8}$  and  $1.0 \times 10^{-7}$  for Patescibacteria and DPANN, respectively).  
385 The only lineages that clustered with Patescibacteria and DPANN along PC1 and PC2 were  
386 Dependitiae and Tenericutes, respectively.

387 The COG categories with the greatest negative effect on PC1, indicative of their relative  
388 depletion in Patescibacteria and DPANN, included E (amino acid metabolism and transport), C  
389 (energy production and conversion), P (inorganic ion transport and metabolism), and H  
390 (coenzyme transport and metabolism). The COG categories with the greatest positive effect on

391 PC1, indicative of their relatively high fraction in genomes of Patescibacteria and DPANN,  
392 included D (cell cycle control and mitosis) and O (post-translational modification, protein  
393 turnover, chaperone functions). Archaea separated from bacteria along the second component  
394 (PC2) ( $p\text{-value} < 2.2 \times 10^{-16}$ ) primarily by their relative enrichment in COG categories B  
395 (chromatin structure and dynamics), K (transcription), and S (unknown functions). This reflects  
396 the major inter-domain differences in DNA packing and transcription, and the greater fraction of  
397 archaeal genomes remaining uncharacterized, as compared to the genomes of Bacteria.

398 Genomes recently shaped by symbiosis often have low coding densities due to rapid gene  
399 loss and pseudogene formation (McCutcheon and Moran, 2012). Inconsistent with this pattern,  
400 we found the coding density of Patescibacteria and DPANN (median = 91%) to be typical of  
401 Bacteria and Archaea (median = 90%), while well-characterized symbionts were separated by  
402 their lower coding density (Figure 7a) (median = 0.87%,  $p\text{-value} = 0.035$  and  $0.028$  compared to  
403 Patescibacteria and DPANN). Although the reduced genome size of Patescibacteria and DPANN  
404 has been viewed as an indication of a symbiotic lifestyle (Castelle et al., 2018), similar genome  
405 sizes (1-2 Mbp) are typical among free-living, marine plankton (Swan et al., 2013; Giovannoni et  
406 al., 2014). Furthermore, recent synthetic biology experimentation has pushed the minimal  
407 genome size limit of a free-living microorganism to ~0.5 Mbp (Hutchison et al., 2016), far below  
408 the predicted sizes of Patescibacteria and DPANN genomes. Collectively, these general genome  
409 features of Patescibacteria and DPANN do not provide convincing evidence of an obligate  
410 symbiotic lifestyle.

411 In this context, the observed gene content similarities between Patescibacteria and  
412 Dependitiae, and between DPANN and most Tenericutes are intriguing (Figure 6).  
413 Dependitiae is a candidate bacterial phylum that has been noted for its reduced coding

414 potential, including a depletion in electron transport chain components (McLean et al., 2013;  
415 Yeoh et al., 2016). It has been speculated that these characteristics indicate a symbiotic lifestyle,  
416 with energy acquired from hosts via ATP/ADP translocases, which has been confirmed  
417 experimentally in a few Dependitiae members (Delafont et al., 2015; Pagnier et al., 2015; Deeg  
418 et al., 2019). The well-characterized members of the bacterial phylum Tenericutes consist mostly  
419 of obligate pathogens with reduced genomes (Moran and Wernegreen, 2000). Interestingly, most  
420 Tenericutes are able to grow as free-living cells in rich media solely by fermentation (Tully et al.,  
421 1977), and were originally hypothesized to represent ancient lineages of life due to their small  
422 genome sizes and limited metabolisms (Morowitz, 1984). While we found all analyzed  
423 Dependitiae and most Tenericutes deplete in oxidoreductases (Figures 7b; Figure 8), only  
424 Tenericutes had a consistently low coding density (median = 71%) that is a characteristic of  
425 recently evolved symbionts (McCutcheon and Moran, 2012) (Figure 7a). Thus, we hypothesize  
426 that these two phyla cluster with the Patescibacteria and DPANN due to similar metabolic  
427 features arrived at by convergent evolutionary processes.

428

#### 429 Oxygen reductase genes

430 In search for an alternative explanation for the unique genealogy, genome content, and  
431 cell sizes of Patescibacteria and DPANN, we examined their energy metabolic coding potential.  
432 We found that only 0.6% of Patescibacteria SAGs (3/492) and none of the DPANN SAGs (0/81)  
433 from these samples encoded for homologs of oxygen reductases (O<sub>2</sub>red), as indicated by the  
434 presence of oxygen-binding subunit I of either the heme-copper oxidase (HCO) or bd-ubiquinol  
435 (bd) oxidase families. The incomplete genome recovery from individual SAGs cannot explain  
436 this pattern, because the 492 Patescibacteria SAGs and 81 DPANN SAGs correspond to a

437 cumulative assembly of 162 and 27 randomly sampled, complete genomes. Furthermore, a  
438 phylogenetic analysis revealed that all three oxygen reductases from Patescibacteria SAGs form  
439 a cluster with other Patescibacteria sequences (Brown et al., 2015; Nelson and Stegen, 2015;  
440 León-Zayas et al., 2017) that is nested within a clade comprised of other phyla (Figure 9). We  
441 infer these phylogenetic relationships as an indication of a relatively recent horizontal gene  
442 transfer (HGT), likely from Proteobacteria and Firmicutes for the HCO and bd sequences,  
443 respectively. Although we did not detect any homologs of oxygen reductases in DPANN SAGs  
444 from our samples, the publicly available bd O<sub>2</sub>red sequences from DPANN metagenome bins  
445 and isolates formed a clade with Actinobacteria and Firmicutes, which we also infer as likely  
446 products of relatively recent HGT events. The topology of these O<sub>2</sub>red phylogenetic trees is  
447 consistent with prior reports, which have also been interpreted as evidence for prevalent HGT of  
448 oxygen reductase genes among other phyla (Brochier-Armanet et al., 2009; Gribaldo et al., 2009;  
449 Borisov et al., 2011). This suggests that the absence of oxygen reductases in Patescibacteria and  
450 DPANN is ancestral and not a result of gene loss due to adaptations to symbiosis, as previously  
451 hypothesized (Castelle et al., 2018).

452

#### 453 Distribution of electron transport chain complexes

454 Patescibacteria and DPANN were depleted in the entire family of oxidoreductase enzyme  
455 genes compared to other bacteria and archaea, (p-value < 2.2 x 10<sup>-16</sup>) (Figures 7b, 8). This  
456 depletion was also significant in relation to symbionts with their comparatively small genome  
457 sizes (p-value < 0.05). Oxidoreductases are key components of both aerobic and anaerobic  
458 respiratory pathways (Jelen et al., 2016), so underrepresentation of them would suggest reduced  
459 functionality of these energy transduction mechanisms. Accordingly, none of the Patescibacteria

460 and DPANN genomes were found to encode a complete ETC consisting of all four complexes  
461 (Figure 8). Putative homologs of at least two of the four ETC complexes were found only in 3%  
462 and 11% of Patescibacteria and DPANN genomes, respectively. We found putative homologs of  
463 genes encoding individual complexes I, II, III, and IV in 0%, 2%, 3%, and 14% of  
464 Patescibacteria genomes. The corresponding numbers for DPANN were 7%, 4%, 0%, and 21%.  
465 Some of these computationally predicted genes are only distantly related to experimentally  
466 verified homologs and therefore may constitute false positives. These findings are consistent  
467 with the lack of complete ETC reports in prior studies of Patescibacteria genomes (Brown et al.,  
468 2015), with the sole exception of a tentative nitric oxide respiration operon found in a single  
469 metagenome bin (Castelle et al., 2017). The sparse and scattered distribution of the putative ETC  
470 gene homologs in Patescibacteria and DPANN (Figure 8) suggest horizontal gene transfer  
471 origins rather than ancestral inheritance. This is consistent with the phylogenetic reconstructions  
472 of other energy transducing genes identified in Patescibacteria, which also suggest evolutionary  
473 origins from horizontal gene transfer (Jaffe et al., 2019). Collectively, our observations indicate  
474 that the absence of complete electron transport chains in Patescibacteria and DPANN is an  
475 ancestral feature, which we propose is more parsimonious than multiple gene loss events due to  
476 obligate symbiosis (Brown et al., 2015; Hug et al., 2016; Castelle et al., 2018; Dombrowski et  
477 al., 2019; Méheust et al., 2019).

478

#### 479 Respiration activity

480 To experimentally test for the presence of active oxidoreductases in a subsurface  
481 microbial community, we employed the fluorogenic oxidoreductase probe RedoxSensor Green  
482 on a deep groundwater sample from South Dakota. This revealed a wide range in fluorescence

483 intensity in phylogenetically diverse cells, with none of the Patescibacteria cells exceeding the  
484 fluorescence of particles in a heat-killed, negative control (Figure 10). To the best of our  
485 knowledge, RedoxSensor Green has not been tested extensively on diverse microbial lineages,  
486 therefore these results should be considered tentative. Nonetheless, both genome content and *in*  
487 *situ* physiology analyses indicate the absence of respiration in Patescibacteria and DPANN,  
488 which corroborates earlier reports of these lineages containing few, if any, components of energy  
489 transducing pathways other than fermentation (Castelle et al., 2018).

490

#### 491 16S rRNA gene phylogeny

492 The placement of Patescibacteria and DPANN in the tree of life is widely debated (Hug  
493 et al., 2016; Williams et al., 2017; Dombrowski et al., 2019). Most current phylogenetic  
494 inferences are based on concatenated single-copy proteins (CSCP), which has the advantage of  
495 higher phylogenetic resolution, as compared to phylogenies of individual genes (Rinke et al.,  
496 2013). However, the unknown genetic change at heterogeneously evolving sites and large  
497 sequence divergence may limit the accuracy of such trees (Pace, 2009; Dombrowski et al., 2019).  
498 To complement the CSCP-resolved genealogy (Figure 2), we performed a large-scale  
499 phylogenetic analysis of the well-established 16S rRNA gene (Woese, 2002) (length > 1,200 bp)  
500 separately for Bacteria and Archaea. The obtained phylogenetic inference (Figure 8) supported  
501 the separation of Patescibacteria and DPANN from other bacterial and archaeal lineages, in  
502 agreement with the phylogenies based on CSCP genes (Castelle et al., 2018) (Figure 2) and a  
503 recent large scale bacterial 16S rRNA gene tree (Schulz et al., 2017). Importantly, we did not  
504 observe grouping of Patescibacteria with fast-evolving lineages (e.g., obligate insect symbionts  
505 and Tenericutes) that could be due to long branch attraction in the 16S rRNA gene phylogeny.

506 This suggests that the divergent branching of Patescibacteria and DPANN is probably not a  
507 result of recent, accelerated divergence.

508

## 509 **Concluding Remarks**

510 Using the collective evidence from cell-cell association, coding potential and  
511 phylogenomic analyses, we propose a new explanation of the unusual biological features of  
512 Patescibacteria and DPANN. Although the Patescibacteria and DPANN contain symbionts  
513 (Huber et al., 2002; Podar et al., 2013; Gong et al., 2014; He et al., 2015; Munson-McGee et al.,  
514 2015; Jarett et al., 2018; Cross et al., 2019; Hamm et al., 2019) and auxotrophies (Castelle et al.,  
515 2018; Dombrowski et al., 2019), we believe that there is not sufficient evidence to conclude that  
516 an ancestral adaptation to symbiosis has led to the reduction of their cell sizes and coding  
517 potential (Castelle et al., 2018; Dombrowski et al., 2019; Méheust et al., 2019). Instead, our data  
518 indicate that most Patescibacteria and DPANN do not form symbiotic cell-cell associations in  
519 subsurface environments, and that their divergent coding potential, small genomes, and small  
520 cell sizes may be a result of a primitive energy metabolism that relies solely on substrate-level  
521 phosphorylation (fermentation), potentially preceding the evolution of electron transport  
522 phosphorylation (respiration). Auxotrophies are very common among microorganisms, and  
523 represent a wide range of dependencies for exogenous cellular components (Zengler and  
524 Zaramela, 2018). Patescibacteria and DPANN may be on the extreme end of the spectrum in  
525 their dependence on other community members, perhaps a reflection of an ancient evolutionary  
526 strategy to limit cellular biosynthetic energy requirements, as energetic allocation is a major  
527 driver of genome evolution in bacteria and archaea (Lynch and Marinov, 2015).

528

529 The authors declare no conflict of interest.

530

## 531 **Acknowledgements**

532

533 We thank the staff of the Bigelow Laboratory for Ocean Science Single Cell Genomics Center  
534 (SCGC) for the generation of single cell genomic data. We also thank Paul Falkowski and Saroj  
535 Poudel for advice on electron transport systems, Jacob Munson-McGee for insightful discussions  
536 on co-sorted SAGs, and David Emerson, Sean Crowe, Paul van der Wielen, Sari Peura, Andreas  
537 Teske, Takuro Nunoura, Christa Schleper, and Steffen Joergensen for contributing field samples.  
538 Thanks also to Richard Friese, Josh Hoines, and Kevin Wilson (National Park Service); Michael  
539 King and John Bredehoft (Hydrodynamics Group); Darrell Lacy, Levi Kryder, John Klenke, and  
540 Jamie Walker (Nuclear Waste Repository Project Office); and Jaret Heise, Tom Regan and  
541 others at Sanford Underground Research Facility (SURF); Corey Lee (US Fish and Wildlife  
542 Service) and The Nature Conservancy for site access and sampling assistance in Nevada and  
543 South Dakota. Special thanks to Brittany Kruger, Josh Sackett, Scott Hamilton-Brehm, John  
544 Healey, Brad Lyles, and Chuck Russell of DRI for sampling assistance in Nevada. Thanks to the  
545 U.S. Forest Service for a permit to conduct research at Little Hot Creek, California and the 2015  
546 International Geobiology Course for field work and sample collection. We also thank Vitaly  
547 Kadnikov, Olga Karnachuk and Tamara Zemskaya for sample collection in Siberia. Also, thanks  
548 to Stephen Grasby, Allyson Brady, and Christine Sharp for sampling Canadian field samples,  
549 and Wen-Jun Li for logistical support and access to hot spring samples in China. We also thank  
550 British Columbia Parks and Parks Canada for permission to sample Dewar Creek and Paint Pots  
551 field sites. This work was funded by the USA National Science Foundation grants 1441717,



552 1826734, and 1335810 (to RS); and 1460861 (REU site at Bigelow Laboratory for Ocean  
553 Sciences). TW, FS and JJ were funded by the U.S. Department of Energy Joint Genome Institute,  
554 a DOE Office of Science User Facility supported under Contract No. DE-AC02-05CH11231.  
555 NVR group was funded by the Russian Science Foundation (grant 19-14-00245). SMS was  
556 funded by USA National Science Foundation grants OCE-0452333 and OCE-1136727. BPH was  
557 funded by NASA Exobiology grant 80NSSC17K0548.

558

### 559 **Author contributions**

560 JPB led data analyses and manuscript preparation. RS developed the concept and managed the  
561 project, with contributions by TW, TCO, DM, JAE, JPB and EDB. EDB, JMB, FS, JKJ, OB, KC  
562 contributed to data analyses. NJP performed cell sorting and size calibration at Bigelow  
563 Laboratory. TCO, DPM, PD, NVR, JRS, BPH, KAK, SMS, MSE, HAB and MBS oversaw field  
564 sample collection. All authors contributed to data interpretation and manuscript preparation.

565

### 566 **References**

567 Altschul, S. F., Gish, W., Miller, W., Myers, E. W., and Lipman, D. J. (1990). Basic local  
568 alignment search tool. *J. Mol. Biol.* 215, 403–410. doi:10.1016/S0022-2836(05)80360-2.  
569 Altschul, S. F., Madden, T. L., Schäffer, A. A., Zhang, J., Zhang, Z., Miller, W., et al. (1997).  
570 Gapped BLAST and PSI-BLAST: A new generation of protein database search programs.  
571 *Nucleic Acids Res.* 25, 3389–3402. doi:10.1093/nar/25.17.3389.  
572 Aramaki, T., Blanc-Mathieu, R., Endo, H., Ohkubo, K., Kanehisa, M., Goto, S., et al. (2019).  
573 KofamKOALA: KEGG ortholog assignment based on profile HMM and adaptive score  
574 threshold. *bioRxiv*, 602110. doi:10.1101/602110.

- 575 Bankevich, A., Nurk, S., Antipov, D., Gurevich, A. A., Dvorkin, M., Kulikov, A. S., et al.  
576 (2012). SPAdes: A new genome assembly algorithm and its applications to single-cell  
577 sequencing. *J. Comput. Biol.* 19, 455–477. doi:10.1089/cmb.2012.0021.
- 578 Bateman, A., Martin, M. J., O'Donovan, C., Magrane, M., Alpi, E., Antunes, R., et al. (2017).  
579 UniProt: The universal protein knowledgebase. *Nucleic Acids Res.* 45, D158–D169.  
580 doi:10.1093/nar/gkw1099.
- 581 Becraft, E. D., Woyke, T., Jarett, J., Ivanova, N., Godoy-Vitorino, F., Poulton, N., et al. (2017).  
582 Rokubacteria: Genomic giants among the uncultured bacterial phyla. *Front. Microbiol.* 8,  
583 1–12. doi:10.3389/fmicb.2017.02264.
- 584 Borisov, V. B., Gennis, R. B., Hemp, J., and Verkhovsky, M. I. (2011). The cytochrome bd  
585 respiratory oxygen reductases. *Biochim. Biophys. Acta - Bioenerg.* 1807, 1398–1413.  
586 doi:10.1016/j.bbabi.2011.06.016.
- 587 Brochier-Armanet, C., Talla, E., and Gribaldo, S. (2009). The multiple evolutionary histories of  
588 dioxygen reductases: Implications for the origin and evolution of aerobic respiration. *Mol.*  
589 *Biol. Evol.* 26, 285–297. doi:10.1093/molbev/msn246.
- 590 Brown, C. T., Hug, L. A., Thomas, B. C., Sharon, I., Castelle, C. J., Singh, A., et al. (2015).  
591 Unusual biology across a group comprising more than 15% of domain Bacteria. *Nature* 523,  
592 208–211. doi:10.1038/nature14486.
- 593 Brown, C. T., Olm, M. R., Thomas, B. C., and Banfield, J. F. (2016). Measurement of bacterial  
594 replication rates in microbial communities. *Nat. Biotechnol.* 34, 1256–1263.  
595 doi:10.1038/nbt.3704.
- 596 Capella-Gutiérrez, S., Silla-Martínez, J. M., and Gabaldón, T. (2009). trimAl: A tool for  
597 automated alignment trimming in large-scale phylogenetic analyses. *Bioinformatics* 25,

- 598 1972–1973. doi:10.1093/bioinformatics/btp348.
- 599 Castelle, C. J., and Banfield, J. F. (2018). Major New Microbial Groups Expand Diversity and  
600 Alter our Understanding of the Tree of Life. *Cell* 172, 1181–1197.  
601 doi:10.1016/j.cell.2018.02.016.
- 602 Castelle, C. J., Brown, C. T., Anantharaman, K., Probst, A. J., Huang, R. H., and Banfield, J. F.  
603 (2018). Biosynthetic capacity, metabolic variety and unusual biology in the CPR and  
604 DPANN radiations. *Nat. Rev. Microbiol.* 16, 629–645. doi:10.1038/s41579-018-0076-2.
- 605 Castelle, C. J., Brown, C. T., Thomas, B. C., Williams, K. H., and Banfield, J. F. (2017).  
606 Unusual respiratory capacity and nitrogen metabolism in a Parcubacterium (OD1) of the  
607 Candidate Phyla Radiation. *Sci. Rep.* 7, 1–12. doi:10.1038/srep40101.
- 608 Castelle, C. J., Wrighton, K. C., Thomas, B. C., Hug, L. A., Brown, C. T., Wilkins, M. J., et al.  
609 (2015). Genomic expansion of domain archaea highlights roles for organisms from new  
610 phyla in anaerobic carbon cycling. *Curr. Biol.* 25, 690–701. doi:10.1016/j.cub.2015.01.014.
- 611 Chen, I. M. A., Chu, K., Palaniappan, K., Pillay, M., Ratner, A., Huang, J., et al. (2019). IMG/M  
612 v.5.0: An integrated data management and comparative analysis system for microbial  
613 genomes and microbiomes. *Nucleic Acids Res.* 47, D666–D677. doi:10.1093/nar/gky901.
- 614 Criscuolo, A., and Gribaldo, S. (2010). BMGE (Block Mapping and Gathering with Entropy): A  
615 new software for selection of phylogenetic informative regions from multiple sequence  
616 alignments. *BMC Evol. Biol.* 10. doi:10.1186/1471-2148-10-210.
- 617 Cross, K. L., Campbell, J. H., Balachandran, M., Campbell, A. G., Cooper, S. J., Griffen, A., et  
618 al. (2019). Targeted isolation and cultivation of uncultivated bacteria by reverse genomics.  
619 *Nat. Biotechnol.* doi:10.1038/s41587-019-0260-6.
- 620 Deeg, C. M., Zimmer, M. M., George, E. E., Husnik, F., Keeling, P. J., and Suttle, C. A. (2019).

- 621 Chromulinavorax destructans, a pathogen of microzooplankton that provides a window into  
622 the enigmatic candidate phylum dependentiae. *PLoS Pathog.* 15, 1–18.  
623 doi:10.1371/journal.ppat.1007801.
- 624 Delafont, V., Samba-Louaka, A., Bouchon, D., Moulin, L., and Héchard, Y. (2015). Shedding  
625 light on microbial dark matter: A TM6 bacterium as natural endosymbiont of a free-living  
626 amoeba. *Environ. Microbiol. Rep.* 7, 970–978. doi:10.1111/1758-2229.12343.
- 627 Dombrowski, N., Lee, J. H., Williams, T. A., Offre, P., and Spang, A. (2019). Genomic  
628 diversity, lifestyles and evolutionary origins of DPANN archaea. *FEMS Microbiol. Lett.*  
629 366, 1–12. doi:10.1093/femsle/fnz008.
- 630 Eddy, S. R. (2011). Accelerated profile HMM searches. *PLoS Comput. Biol.* 7.  
631 doi:10.1371/journal.pcbi.1002195.
- 632 Eloë-Fadrosh, E. A., Paez-Espino, D., Jarett, J., Dunfield, P. F., Hedlund, B. P., Dekas, A. E., et  
633 al. (2016). Global metagenomic survey reveals a new bacterial candidate phylum in  
634 geothermal springs. *Nat. Commun.* 7, 1–10. doi:10.1038/ncomms10476.
- 635 Giovannoni, S. J., Cameron Thrash, J., and Temperton, B. (2014). Implications of streamlining  
636 theory for microbial ecology. *ISME J.* 8, 1553–1565. doi:10.1038/ismej.2014.60.
- 637 Gong, J., Qing, Y., Guo, X., and Warren, A. (2014). “Candidatus Sonnebornia yantaiensis”, a  
638 member of candidate division OD1, as intracellular bacteria of the ciliated protist  
639 Paramecium bursaria (Ciliophora, Oligohymenophorea). *Syst. Appl. Microbiol.* 37, 35–41.  
640 doi:10.1016/j.syapm.2013.08.007.
- 641 Gribaldo, S., Talla, E., and Brochier-Armanet, C. (2009). Evolution of the haem copper oxidases  
642 superfamily: a rooting tale. *Trends Biochem. Sci.* 34, 375–381.  
643 doi:10.1016/j.tibs.2009.04.002.

- 644 Hamm, J. N., Erdmann, S., Eloë-Fadrosh, E. A., Angeloni, A., Zhong, L., Brownlee, C., et al.  
645 (2019). Unexpected host dependency of Antarctic Nanohaloarchaeota. *Proc. Natl. Acad.*  
646 *Sci. U. S. A.* 116, 14661–14670. doi:10.1073/pnas.1905179116.
- 647 Hatzenpichler, R., Connon, S. A., Goudeau, D., Malmstrom, R. R., Woyke, T., and Orphan, V. J.  
648 (2016). Visualizing in situ translational activity for identifying and sorting slow-growing  
649 archaeal - bacterial consortia. *Proc. Natl. Acad. Sci. U. S. A.* 113, E4069–E4078.  
650 doi:10.1073/pnas.1603757113.
- 651 He, X., McLean, J. S., Edlund, A., Yooseph, S., Hall, A. P., Liu, S. Y., et al. (2015). Cultivation  
652 of a human-associated TM7 phylotype reveals a reduced genome and epibiotic parasitic  
653 lifestyle. *Proc. Natl. Acad. Sci. U. S. A.* 112, 244–249. doi:10.1073/pnas.1419038112.
- 654 Hershey, O. S., Kallmeyer, J., Wallace, A., Barton, M. D., and Barton, H. A. (2018). High  
655 microbial diversity despite extremely low biomass in a deep karst aquifer. *Front. Microbiol.*  
656 9, 1–13. doi:10.3389/fmicb.2018.02823.
- 657 Hongoh, Y., Sharma, V. K., Prakash, T., Noda, S., Taylor, T. D., Kudo, T., et al. (2008).  
658 Complete genome of the uncultured Termite Group 1 bacteria in a single host protist cell.  
659 *Proc. Natl. Acad. Sci. U. S. A.* 105, 5555–5560. doi:10.1073/pnas.0801389105.
- 660 Huber, H., Hohn, M. J., Rachel, R., Fuchs, T., Wimmer, V. C., and Stetter, K. O. (2002). A new  
661 phylum of Archaea represented by a nanosized hyperthermophilic symbiont. *Nature* 417,  
662 63–67. doi:10.1038/417063a.
- 663 Hug, L. A., Baker, B. J., Anantharaman, K., Brown, C. T., Probst, A. J., Castelle, C. J., et al.  
664 (2016). A new view of the tree of life. *Nat. Microbiol.* 1, 1–6.  
665 doi:10.1038/nmicrobiol.2016.48.
- 666 Huntemann, M., Ivanova, N. N., Mavromatis, K., Tripp, H. J., Paez-Espino, D., Tennessen, K., et

- 667 al. (2016). The standard operating procedure of the DOE-JGI Metagenome Annotation  
668 Pipeline (MAP v.4). *Stand. Genomic Sci.* 11, 1–5. doi:10.1186/s40793-016-0138-x.
- 669 Hutchison, C. A., Chuang, R. Y., Noskov, V. N., Assad-Garcia, N., Deerinck, T. J., Ellisman, M.  
670 H., et al. (2016). Design and synthesis of a minimal bacterial genome. *Science (80-. )*. 351.  
671 doi:10.1126/science.aad6253.
- 672 Hyatt, D., Chen, G. L., LoCascio, P. F., Land, M. L., Larimer, F. W., and Hauser, L. J. (2010).  
673 Prodigal: Prokaryotic gene recognition and translation initiation site identification. *BMC*  
674 *Bioinformatics* 11. doi:10.1186/1471-2105-11-119.
- 675 Jaffe, A. L., Castelle, C. J., Carnevali, P. B. M., Gribaldo, S., and Banfield, J. F. (2019). The rise  
676 of diversity in metabolic platforms across the Candidate Phyla Radiation. *bioRxiv*, 1–29.
- 677 Jain, C., Rodriguez-R, L. M., Phillippy, A. M., Konstantinidis, K. T., and Aluru, S. (2018). High  
678 throughput ANI analysis of 90K prokaryotic genomes reveals clear species boundaries. *Nat.*  
679 *Commun.* 9, 1–8. doi:10.1038/s41467-018-07641-9.
- 680 Jarett, J. K., Nayfach, S., Podar, M., Inskeep, W., Ivanova, N. N., Munson-Mcgee, J., et al.  
681 (2018). Single-cell genomics of co-sorted Nanoarchaeota suggests novel putative host  
682 associations and diversification of proteins involved in symbiosis 06 Biological Sciences  
683 0604 Genetics. *Microbiome* 6, 1–14. doi:10.1186/s40168-018-0539-8.
- 684 Jelen, B. I., Giovannelli, D., and Falkowski, P. G. (2016). The Role of Microbial Electron  
685 Transfer in the Coevolution of the Biosphere and Geosphere. *Annu. Rev. Microbiol.* 70, 45–  
686 62. doi:10.1146/annurev-micro-102215-095521.
- 687 León-Zayas, R., Peoples, L., Biddle, J. F., Podell, S., Novotny, M., Cameron, J., et al. (2017).  
688 The metabolic potential of the single cell genomes obtained from the Challenger Deep,  
689 Mariana Trench within the candidate superphylum Parcubacteria (OD1). *Environ.*

- 690 *Microbiol.* 19, 2769–2784. doi:10.1111/1462-2920.13789.
- 691 Letunic, I., and Bork, P. (2019). Interactive Tree Of Life (iTOL) v4: recent updates and new  
692 developments. *Nucleic Acids Res.* 47, W256–W259. doi:10.1093/nar/gkz239.
- 693 Luef, B., Frischkorn, K. R., Wrighton, K. C., Holman, H. Y. N., Birarda, G., Thomas, B. C., et  
694 al. (2015). Diverse uncultivated ultra-small bacterial cells in groundwater. *Nat. Commun.* 6,  
695 1–8. doi:10.1038/ncomms7372.
- 696 Lynch, M., and Marinov, G. K. (2015). The bioenergetic costs of a gene. *Proc. Natl. Acad. Sci.*  
697 *U. S. A.* 112, 15690–15695. doi:10.1073/pnas.1514974112.
- 698 Maniloff, J., Neelson, K. H., Psenner, R., Loferer, M., and Folk, R. L. (1997). Nannobacteria:  
699 Size Limits and Evidence. *Science (80-. )*. 276, 1773–1776.
- 700 Martinez-Garcia, M., Brazel, D., Poulton, N. J., Swan, B. K., Gomez, M. L., Masland, D., et al.  
701 (2012). Unveiling in situ interactions between marine protists and bacteria through single  
702 cell sequencing. *ISME J.* 6, 703–707. doi:10.1038/ismej.2011.126.
- 703 McCutcheon, J. P., and Moran, N. A. (2012). Extreme genome reduction in symbiotic bacteria.  
704 *Nat. Rev. Microbiol.* 10, 13–26. doi:10.1038/nrmicro2670.
- 705 McLean, J. S., Lombardo, M. J., Badger, J. H., Edlund, A., Novotny, M., Yee-Greenbaum, J., et  
706 al. (2013). Candidate phylum TM6 genome recovered from a hospital sink biofilm provides  
707 genomic insights into this uncultivated phylum. *Proc. Natl. Acad. Sci. U. S. A.* 110.  
708 doi:10.1073/pnas.1219809110.
- 709 Méheust, R., Burstein, D., Castelle, C. J., and Banfield, J. F. (2019). The distinction of CPR  
710 bacteria from other bacteria based on protein family content. *Nat. Commun.* 10.  
711 doi:10.1038/s41467-019-12171-z.
- 712 Moran, N. A., and Wernegreen, J. J. (2000). Lifestyle evolution in symbiotic bacteria: Insights

- 713 from genomics. *Trends Ecol. Evol.* 15, 321–326. doi:10.1016/S0169-5347(00)01902-9.
- 714 Morowitz, H. (1984). The Completeness of Molecular Biology. *Isr. J. Med. Sci.* 20, 750–753.
- 715 Moser, D. P., Hamilton-Brehm, S. D., Fisher, J. C., Bruckner, J. C., Kruger, B., and Sackett, J.
- 716 (2015). Radiochemically-supported microbial communities: a potential mechanism for
- 717 biocolloid production of importance to actinide transport.
- 718 Munson-McGee, J. H., Field, E. K., Bateson, M., Rooney, C., Stepanauskas, R., and Young, J.
- 719 (2015). Distribution across Yellowstone National Park Hot Springs. *Appl. Environ.*
- 720 *Microbiol.* 81, 7860–7868. doi:10.1128/AEM.01539-15.Editor.
- 721 Nakamura, T., Yamada, K. D., Tomii, K., and Katoh, K. (2018). Parallelization of MAFFT for
- 722 large-scale multiple sequence alignments. *Bioinformatics* 34, 2490–2492.
- 723 doi:10.1093/bioinformatics/bty121.
- 724 Nawrocki, E. P. (2009). Structural RNA Homology Search and Alignment Using Covariance
- 725 Models.
- 726 Nawrocki, E. P., and Eddy, S. R. (2013). Infernal 1.1: 100-fold faster RNA homology searches.
- 727 *Bioinformatics* 29, 2933–2935. doi:10.1093/bioinformatics/btt509.
- 728 Nelson, W. C., and Stegen, J. C. (2015). The reduced genomes of Parcubacteria (OD1) contain
- 729 signatures of a symbiotic lifestyle. *Front. Microbiol.* 6, 1–14.
- 730 doi:10.3389/fmicb.2015.00713.
- 731 Nurk, S., Bankevich, A., Antipov, D., Gurevich, A. A., Korobeynikov, A., Lapidus, A., et al.
- 732 (2013). Assembling single-cell genomes and mini-metagenomes from chimeric MDA
- 733 products. *J. Comput. Biol.* 20, 714–737. doi:10.1089/cmb.2013.0084.
- 734 Pace, N. R. (2009). Mapping the Tree of Life: Progress and Prospects. *Microbiol. Mol. Biol. Rev.*
- 735 73, 565–576. doi:10.1128/mubr.00033-09.



- 736 Pagnier, I., Yutin, N., Croce, O., Makarova, K. S., Wolf, Y. I., Benamar, S., et al. (2015). Babela  
737 massiliensis, a representative of a widespread bacterial phylum with unusual adaptations to  
738 parasitism in amoebae. *Biol. Direct* 10, 1–17. doi:10.1186/s13062-015-0043-z.
- 739 Parks, D. H., Imelfort, M., Skennerton, C. T., Hugenholtz, P., and Tyson, G. W. (2015).  
740 CheckM: Assessing the quality of microbial genomes recovered from isolates, single cells,  
741 and metagenomes. *Genome Res.* 25, 1043–1055. doi:10.1101/gr.186072.114.
- 742 Podar, M., Makarova, K. S., Graham, D. E., Wolf, Y. I., Koonin, E. V., and Reysenbach, A. L.  
743 (2013). Insights into archaeal evolution and symbiosis from the genomes of a nanoarchaeon  
744 and its inferred crenarchaeal host from Obsidian Pool, Yellowstone National Park. *Biol.*  
745 *Direct* 8, 1–20. doi:10.1186/1745-6150-8-9.
- 746 Price, M. N., Dehal, P. S., and Arkin, A. P. (2010). FastTree 2 - Approximately maximum-  
747 likelihood trees for large alignments. *PLoS One* 5. doi:10.1371/journal.pone.0009490.
- 748 Quast, C., Pruesse, E., Yilmaz, P., Gerken, J., Schweer, T., Yarza, P., et al. (2013). The SILVA  
749 ribosomal RNA gene database project: Improved data processing and web-based tools.  
750 *Nucleic Acids Res.* 41, 590–596. doi:10.1093/nar/gks1219.
- 751 Rinke, C., Schwientek, P., Sczyrba, A., Ivanova, N. N., Anderson, I. J., Cheng, J. F., et al.  
752 (2013). Insights into the phylogeny and coding potential of microbial dark matter. *Nature*  
753 499, 431–437. doi:10.1038/nature12352.
- 754 Sackett, J. D. (2018). Prokaryotic diversity and aqueous geochemistry of subsurface  
755 environments of the Death Valley Regional Flow System.
- 756 Sackett, J. D., Huerta, D. C., Kruger, B. R., Hamilton-Brehm, S. D., and Moser, D. P. (2018). A  
757 comparative study of prokaryotic diversity and physicochemical characteristics of devils  
758 hole and the ash meadows fish conservation facility, a constructed analog. *PLoS One* 13, 1–

- 759 21. doi:10.1371/journal.pone.0194404.
- 760 Sackett, J. D., Kruger, B. R., Becraft, E. D., Jarett, J. K., Stepanauskas, R., Woyke, T., et al.  
761 (2019). Four Draft Single-Cell Genome Sequences of Novel, Nearly Identical  
762 Kiritimatiellaeta Strains Isolated from the Continental Deep Subsurface . *Microbiol.*  
763 *Resour. Announc.* 8, 1–4. doi:10.1128/mra.01249-18.
- 764 Safarian, S., Rajendran, C., Müller, H., Preu, J., Langer, J. D., Ovchinnikov, S., et al. (2016).  
765 Structure of a bd oxidase indicates similar mechanisms for membraneintegrated oxygen  
766 reductases. *Science (80-. )*. 352, 583–586. doi:10.1126/science.aaf2477.
- 767 Schloss, P. D., Westcott, S. L., Ryabin, T., Hall, J. R., Hartmann, M., Hollister, E. B., et al.  
768 (2009). Introducing mothur: Open-source, platform-independent, community-supported  
769 software for describing and comparing microbial communities. *Appl. Environ. Microbiol.*  
770 75, 7537–7541. doi:10.1128/AEM.01541-09.
- 771 Schulz, F., Eloë-Fadrosh, E. A., Bowers, R. M., Jarett, J., Nielsen, T., Ivanova, N. N., et al.  
772 (2017). Towards a balanced view of the bacterial tree of life. *Microbiome* 5, 140.  
773 doi:10.1186/s40168-017-0360-9.
- 774 Seemann, T. (2014). Prokka: Rapid prokaryotic genome annotation. *Bioinformatics* 30, 2068–  
775 2069. doi:10.1093/bioinformatics/btu153.
- 776 Shen, W., Le, S., Li, Y., and Hu, F. (2016). SeqKit: A cross-platform and ultrafast toolkit for  
777 FASTA/Q file manipulation. *PLoS One* 11, 1–10. doi:10.1371/journal.pone.0163962.
- 778 Sousa, F. L., Alves, R. J., Pereira-Leal, J. B., Teixeira, M., and Pereira, M. M. (2011). A  
779 bioinformatics classifier and database for Heme-Copper oxygen reductases. *PLoS One* 6, 1–  
780 9. doi:10.1371/journal.pone.0019117.
- 781 Stepanauskas, R., Fergusson, E. A., Brown, J., Poulton, N. J., Tupper, B., Labonté, J. M., et al.

- 782 (2017). Improved genome recovery and integrated cell-size analyses of individual  
783 uncultured microbial cells and viral particles. *Nat. Commun.* 8. doi:10.1038/s41467-017-  
784 00128-z.
- 785 Swan, B. K., Tupper, B., Sczyrba, A., Lauro, F. M., Martinez-Garcia, M., González, J. M., et al.  
786 (2013). Prevalent genome streamlining and latitudinal divergence of planktonic bacteria in  
787 the surface ocean. *Proc. Natl. Acad. Sci. U. S. A.* 110, 11463–11468.  
788 doi:10.1073/pnas.1304246110.
- 789 Team, Rs. (2016). RStudio: Integrated Development for R.
- 790 Thomas, J. M., Moser, D. P., Fisher, J. C., Reihle, J., Wheatley, A., Hershey, R. L., et al. (2013).  
791 Using Water Chemistry, Isotopes and Microbiology to Evaluate Groundwater Sources,  
792 Flow Paths and Geochemical Reactions in the Death Valley Flow System, USA. *Procedia*  
793 *Earth Planet. Sci.* 7, 842–845. doi:10.1016/j.proeps.2013.03.033.
- 794 Tully, J. G., Whitcomb, R. F., Clark, F. H., and Williamson, D. L. (1977). Pathogenic  
795 mycoplasmas: Cultivation and vertebrate pathogenicity of a new spiroplasma. *Science* (80-  
796 ). 195, 892–894. doi:10.1126/science.841314.
- 797 Wickham, H. (2016). ggplot2: Elegant Graphics for Data Analysis. Available at:  
798 <https://ggplot2.tidyverse.org>.
- 799 Williams, T. A., Szölloosi, G. J., Spang, A., Foster, P. G., Heaps, S. E., Boussau, B., et al. (2017).  
800 Integrative modeling of gene and genome evolution roots the archaeal tree of life. *Proc.*  
801 *Natl. Acad. Sci. U. S. A.* 114, E4602–E4611. doi:10.1073/pnas.1618463114.
- 802 Woese, C. R. (2002). On the evolution of cells. *Proc. Natl. Acad. Sci. U. S. A.* 99, 8742–8747.  
803 doi:10.1073/pnas.132266999.
- 804 Woyke, T., Xie, G., Copeland, A., González, J. M., Han, C., Kiss, H., et al. (2009). Assembling

805 the marine metagenome, one cell at a time. *PLoS One* 4. doi:10.1371/journal.pone.0005299.

806 Wrighton, K. C., Thomas, B. C., Sharon, I., Miller, C. S., Castelle, C. J., VerBerkmoes, N. C., et  
807 al. (2012). Fermentation, hydrogen, and sulfur metabolism in multiple uncultivated bacterial  
808 phyla. *Science* (80-. ). 337, 1661–1665. doi:10.1126/science.1224041.

809 Yeoh, Y. K., Sekiguchi, Y., Parks, D. H., and Hugenholtz, P. (2016). Comparative genomics of  
810 candidate phylum tm6 suggests that parasitism is widespread and ancestral in this lineage.  
811 *Mol. Biol. Evol.* 33, 915–927. doi:10.1093/molbev/msv281.

812 Yu, F. B., Blainey, P. C., Schulz, F., Woyke, T., Horowitz, M. A., and Quake, S. R. (2017).  
813 Microfluidic-based mini-metagenomics enables discovery of novel microbial lineages from  
814 complex environmental samples. *Elife* 6, 1–20. doi:10.7554/eLife.26580.

815 Zengler, K., and Zaramela, L. S. (2018). The social network of microorganisms - How  
816 auxotrophies shape complex communities. *Nat. Rev. Microbiol.* 16, 383–390.  
817 doi:10.1038/s41579-018-0004-5.

818

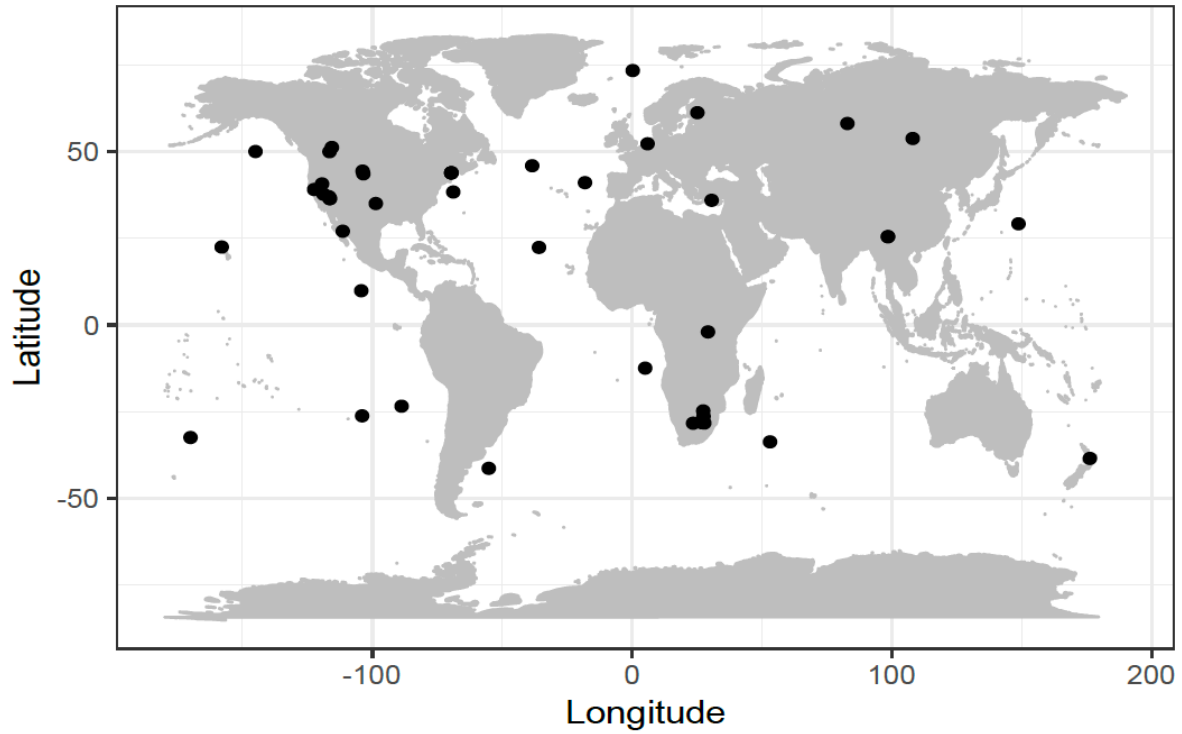

819 **Figure 1.** Geographic locations of sample collection sites.

820  
821  
822  
823  
824  
825  
826  
827  
828  
829  
830  
831  
832  
833  
834  
835  
836  
837  
838  
839  
840  
841  
842  
843  
844

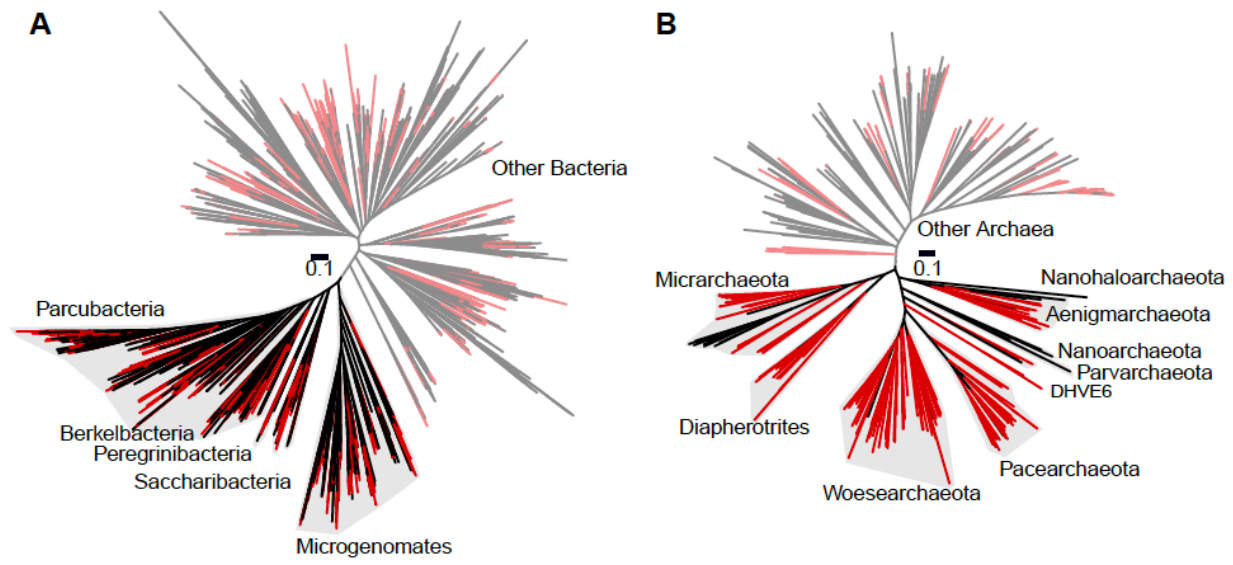

845

846 **Figure 2.** Maximum likelihood concatenated phylogenetic tree of single copy proteins (n=5)  
847 from Bacteria (a) and Archaea (b). All SAGs from this study are highlighted red. Patescibacteria  
848 and DPANN are highlighted with grey and labeled by individual proposed phyla within the  
849 superphylum (Rinke et al., 2013; Brown et al., 2015).

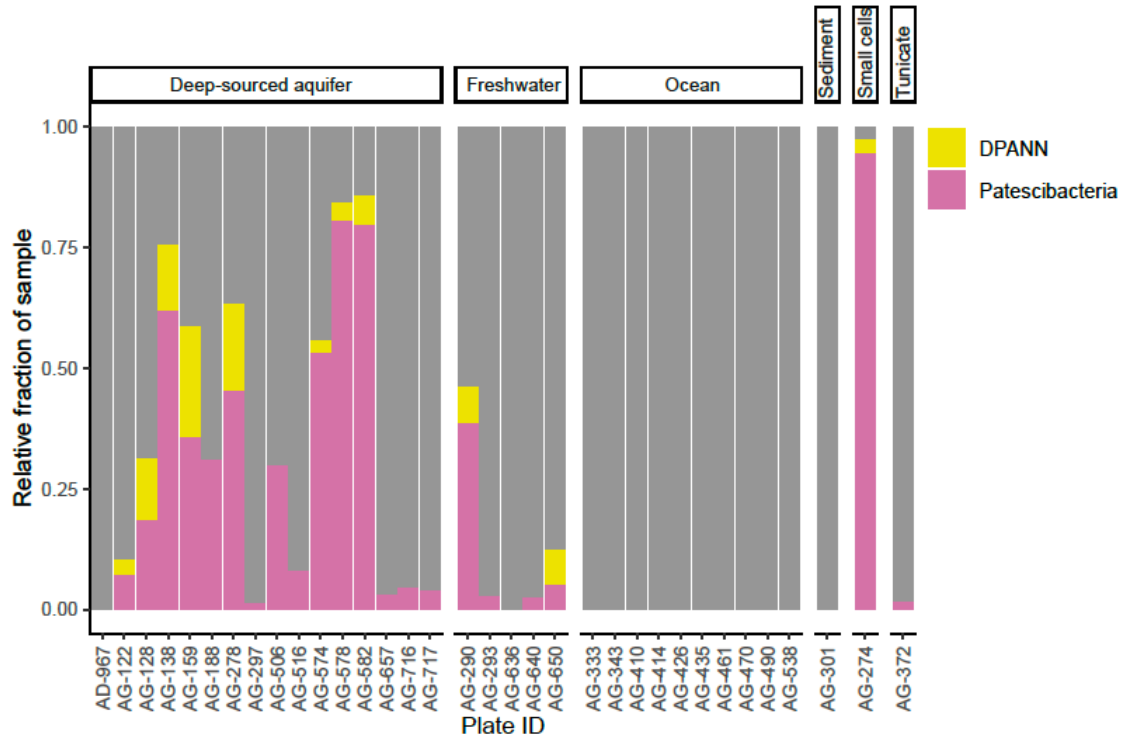

850 **Figure 3.** Relative abundance of Patescibacteria and DPANN from 34 geographically diverse  
851 samples determined from randomly sequenced LoCoS SAGs. The plate identifiers can be cross-  
852 referenced with specific SAGs and geographic sites in Table S1. The AG-274 sample contains  
853 small cells from a water-filled rock fracture at 1,340 m depth below surface in the Beatrix gold  
854 mine in South Africa.

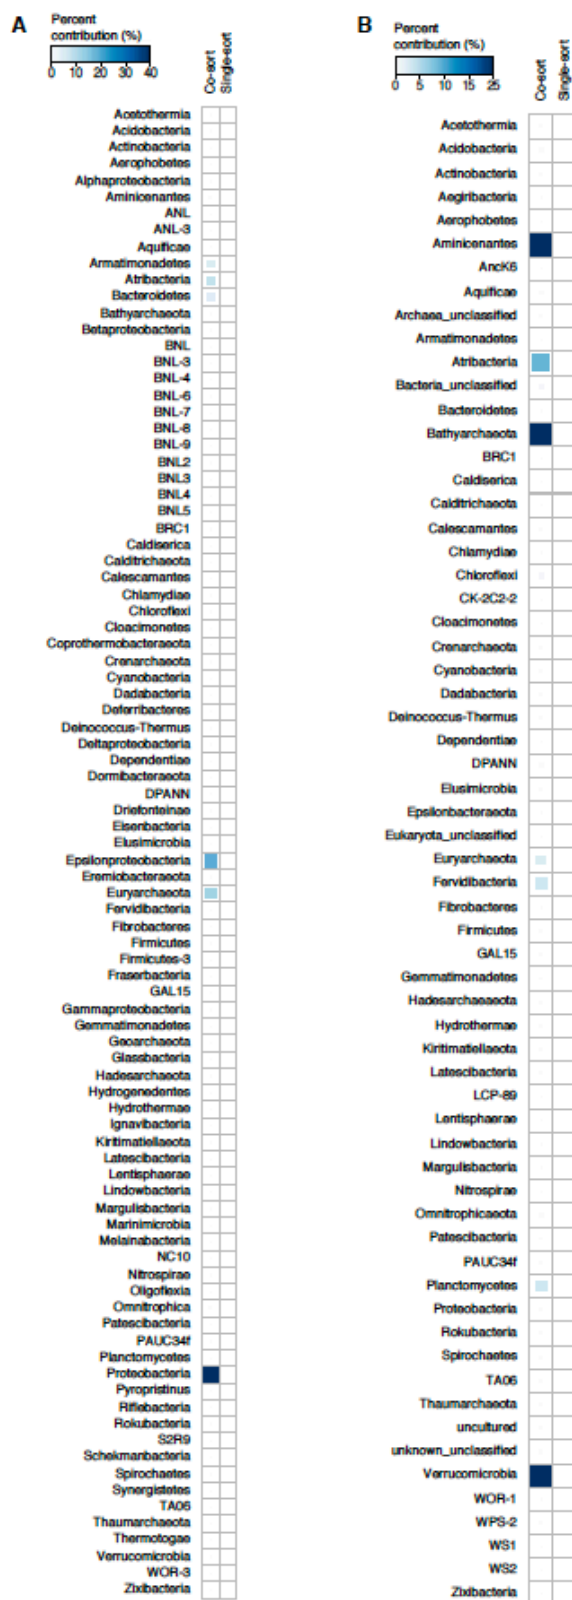

855 **Figure 4.** Plot of the percent contribution of individual phyla to the Chi-square statistic from  
 856 checkM (A) and 16S rRNA gene (B) co-sorting analyses. Classification of phyla in (A) from  
 857 concatenated phylogenetic tree in Figure 2 (Table S1) and from 16S taxonomy in (B).



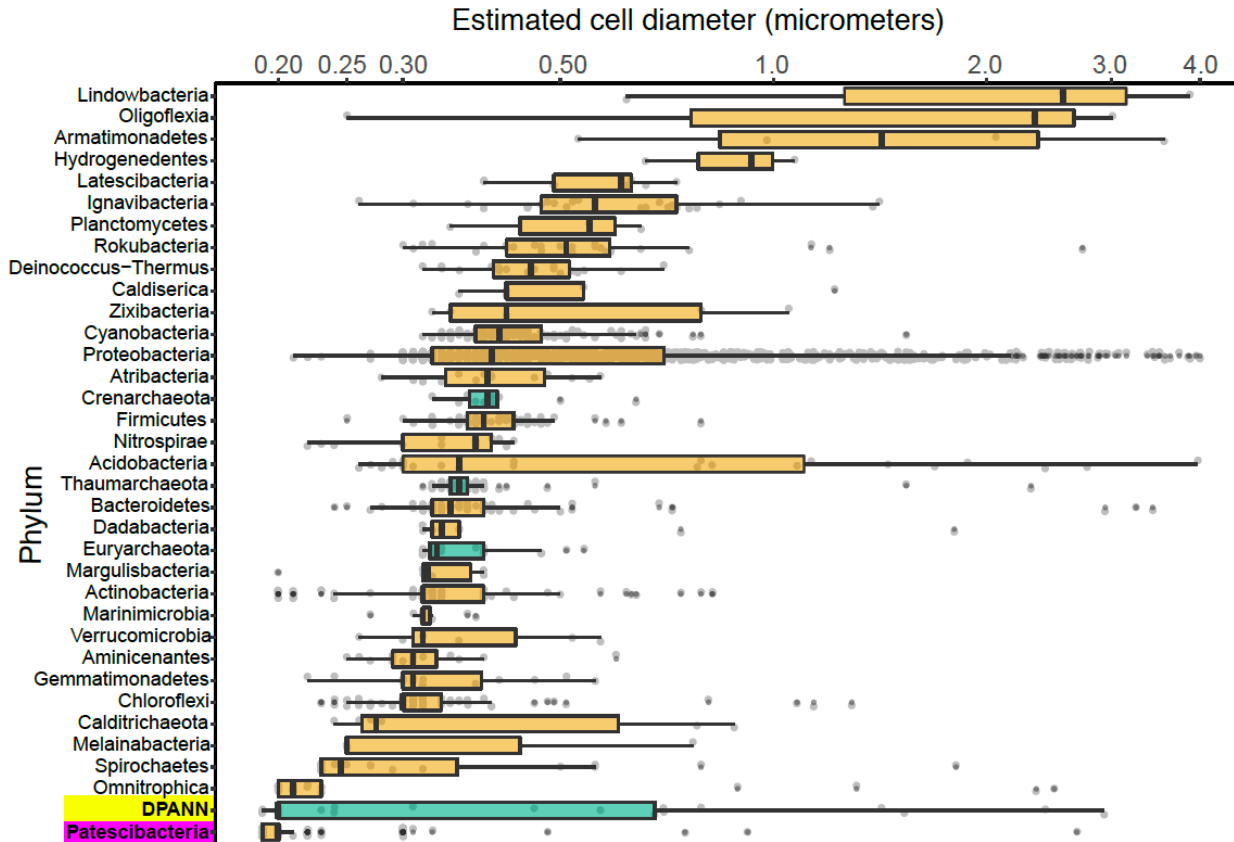

858 **Figure 5.** Phylum-resolved cell diameters. Solid black bars indicate medians; boxes represent the  
859 interquartile ranges (IQR) of the 1<sup>st</sup> (Q1) and 3<sup>rd</sup> (Q3) quartiles; whiskers denote the minimum  
860 (Q1 - 1.5\*IQR) and maximum (Q3 + 1.5\*IQR) values; outliers outside of the whiskers are  
861 marked by black dots. Orange indicates Bacteria and green indicates Archaea. A pairwise  
862 ranked-sum Wilcoxon test confirmed that the median diameter of Patescibacteria (highlighted in  
863 magenta) was smaller than most other phyla (27/36 phyla with p-values < 0.05; Table S5). The  
864 median diameter of DPANN (highlighted in yellow) was not significantly different from other  
865 archaea (1/36 phyla with p-values < 0.05; Table S5), likely due to the large variability in  
866 DPANN cell diameters. Individual cell diameters are available in Table S1 and pairwise p-values  
867 are located in Table S5.  
868

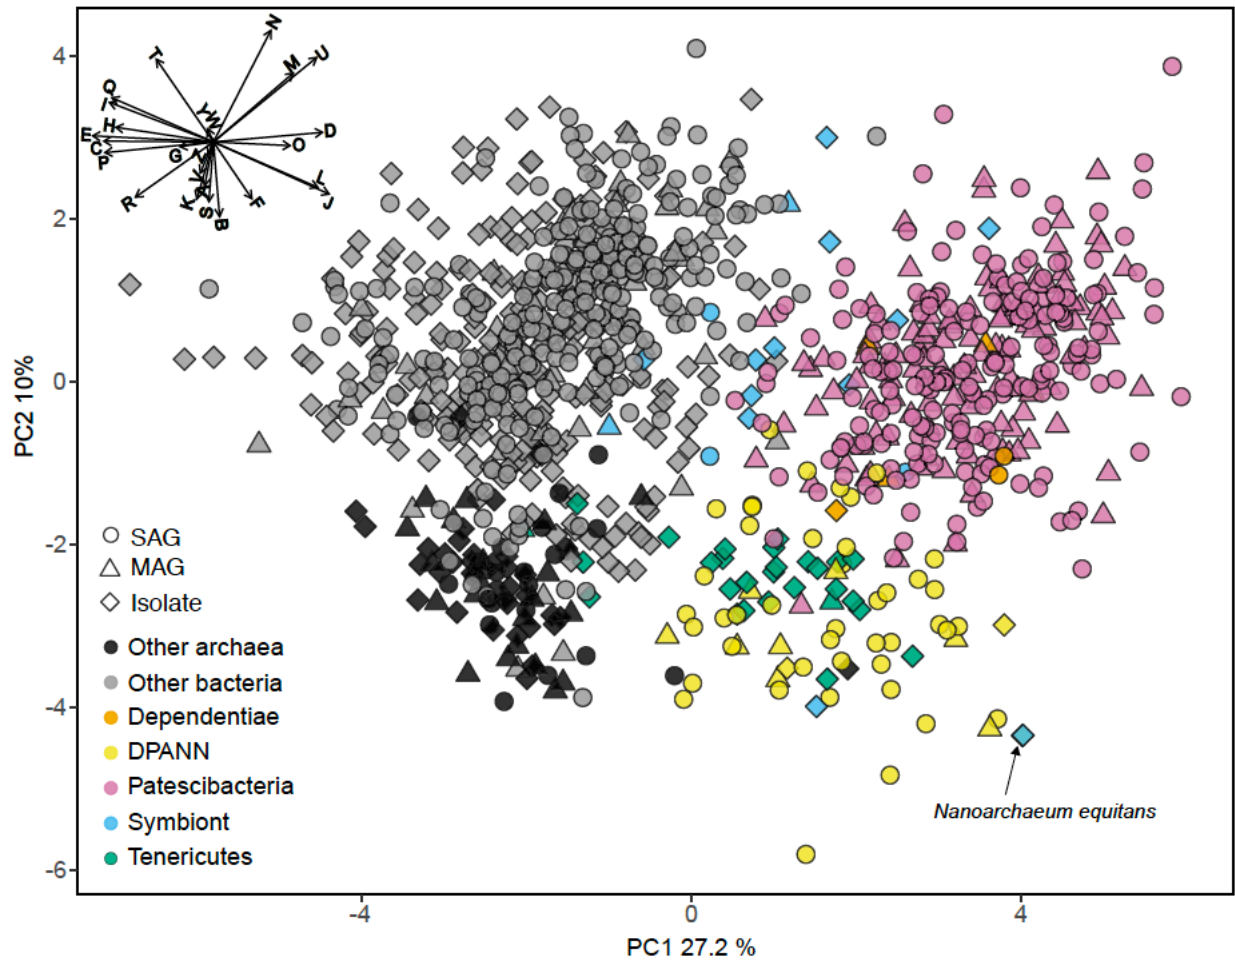

869 **Figure 6.** Principal components analysis (PCA) of the relative abundance of clusters of  
 870 orthologous groups (COG) categories as the input variables. SAGs from this study (Table S1)  
 871 and other studies (Table S2) with >30% completeness and had a near-full-length 16S rRNA gene  
 872 and were included in the phylogenetic tree in Figure 8 (n=1,092). The vector plot in the upper  
 873 left corner shows the COG categories that contributed to the most separation of the genomes:  
 874 **Information Storage and Processing** Translation, ribosomal structure and biogenesis (J), RNA  
 875 processing and modification (A), Transcription (K), Replication, recombination and repair (L),  
 876 Chromatin structure and dynamics (B); **Cellular Processes and Signaling** Cell cycle control,  
 877 cell division, chromosome partitioning (D), Nuclear structure (Y), Defense mechanisms (V),  
 878 Signal transduction mechanisms (T), Cell wall/membrane/envelope biogenesis (M), Cell motility  
 879 (N), Cytoskeleton (Z), Extracellular structures (W), Intracellular trafficking, secretion, and  
 880 vesicular transport (U), Posttranslational modification, protein turnover, chaperones (O);  
 881 **Metabolism** Energy production and conversion (C), Carbohydrate transport and metabolism (G),  
 882 Amino acid transport and metabolism (E), Nucleotide transport and metabolism (F), Coenzyme  
 883 transport and metabolism (H), Lipid transport and metabolism (I), Inorganic ion transport and  
 884 metabolism (P), Secondary metabolites biosynthesis, transport and catabolism (Q); **Poorly**  
 885 **Characterized** General function prediction only (R), Function unknown (S). SAG, single  
 886 amplified genome; MAG, metagenome assembled genome. Symbiont genomes are listed in  
 887 Table S4. Note position of *Nanoarchaeum equitans* with black arrow.

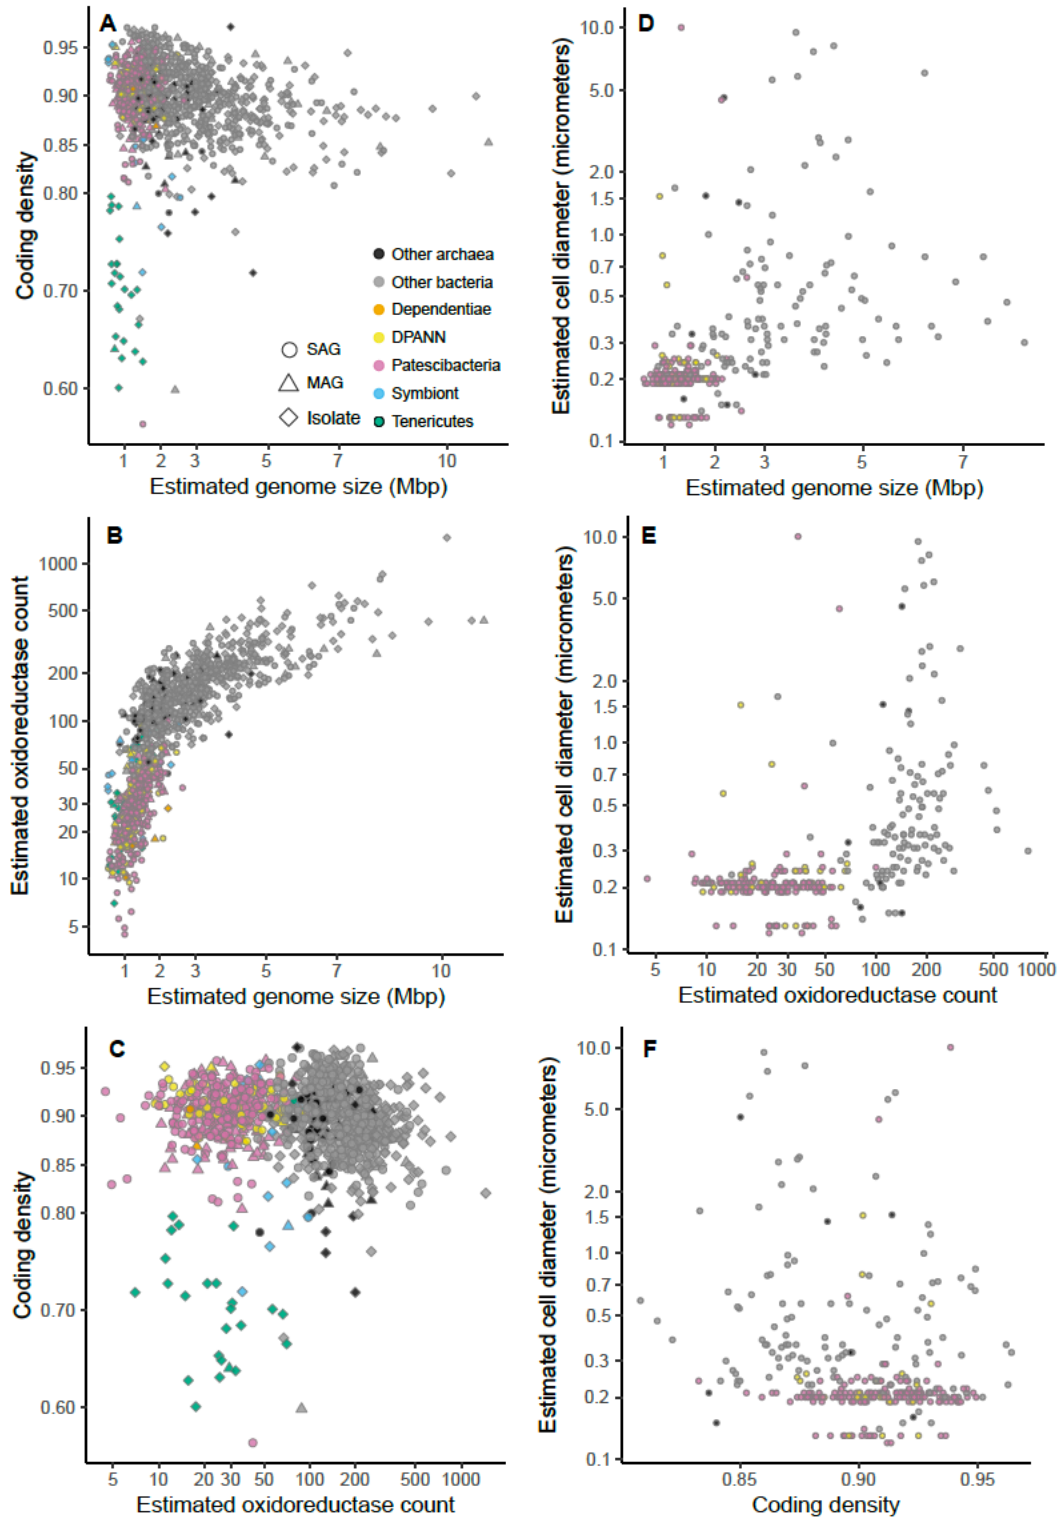

888 **Figure 7.** Relationship plots between estimated genome size, coding density, oxidoreductase  
889 count, and cell diameter among SAGs (Table S1) and other genome sequences (Table S2) that  
890 were greater than or equal to 30% complete, and were included in the 16S rRNA gene tree in  
891 Figure 8. Symbiont genomes are listed in Table S4.

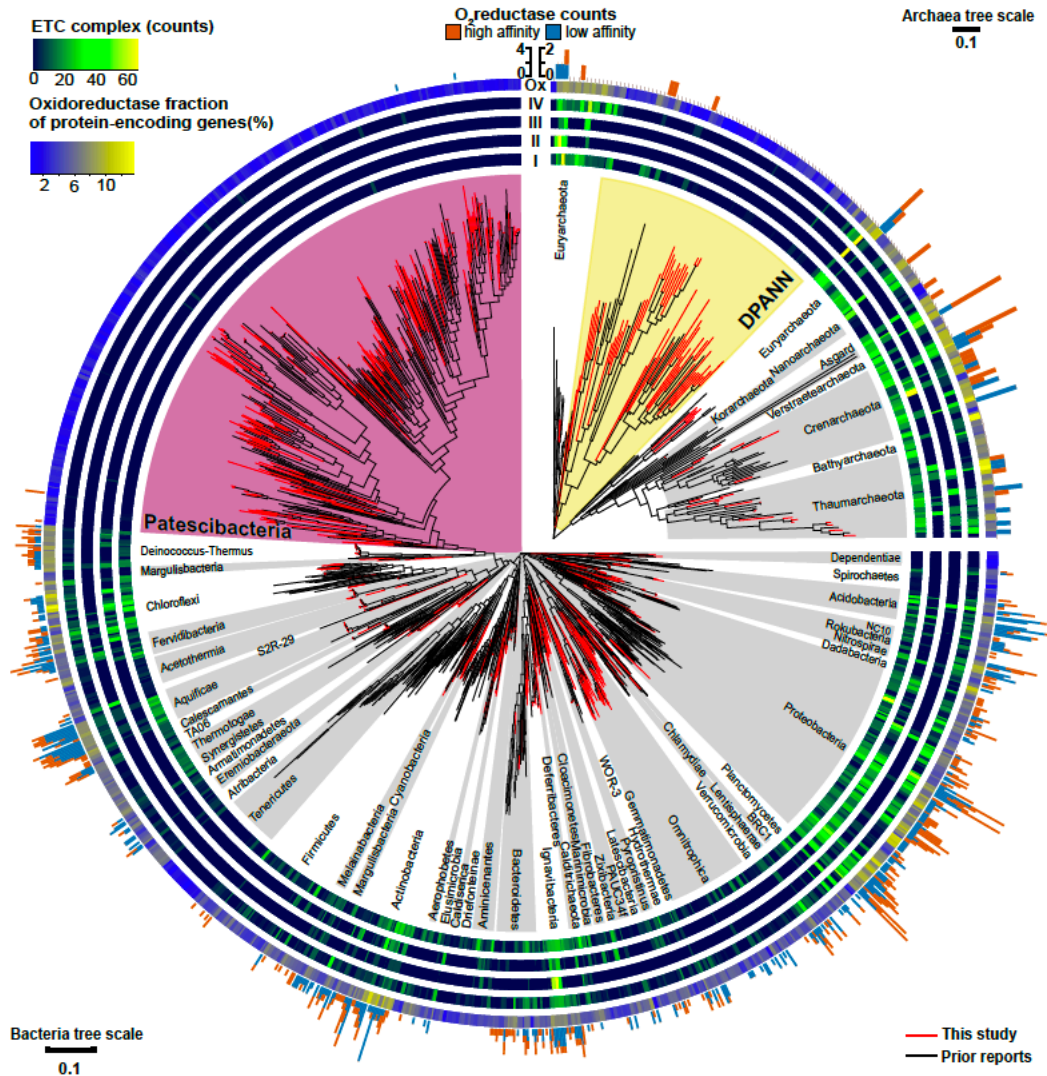

892 **Figure 8.** Maximum likelihood phylogeny of near full-length (>1,200 bp) 16S rRNA genes from  
 893 Bacteria and Archaea, annotated with the distribution of counts for electron transport chain  
 894 complexes, oxygen reductases, and oxidoreductase (Enzyme Commission 1; EC1) relative  
 895 abundances from SAGs in this study (Table S1) and previously reported genome sequences  
 896 (Table S2). The four innermost rings depict the counts of the electron transport chain complexes:  
 897 I (NADH dehydrogenase subunits), II (succinate dehydrogenase subunits), III (cytochrome c  
 898 reductase subunits), and IV (oxygen, nitrate, sulfate, iron, arsenate, and selenate reductase  
 899 subunits). The outermost ring shows the relative abundance of oxidoreductases (Ox) for each  
 900 genome assembly as a gradient from low (blue) to high (yellow). The peripheral stacked bar  
 901 charts show the counts of oxygen reductases from both the heme copper oxidase and bd-  
 902 ubiquinol oxidase oxygen reductase (O<sub>2</sub>red) families grouped as high (orange) or low (sky blue)  
 903 affinity for oxygen (note scale bar differences between bacterial and archaeal trees).  
 904 Patescibacteria are highlighted in magenta and DPANN are highlighted in yellow. Other  
 905 bacterial and archaeal phyla are highlighted in alternating white and grey.

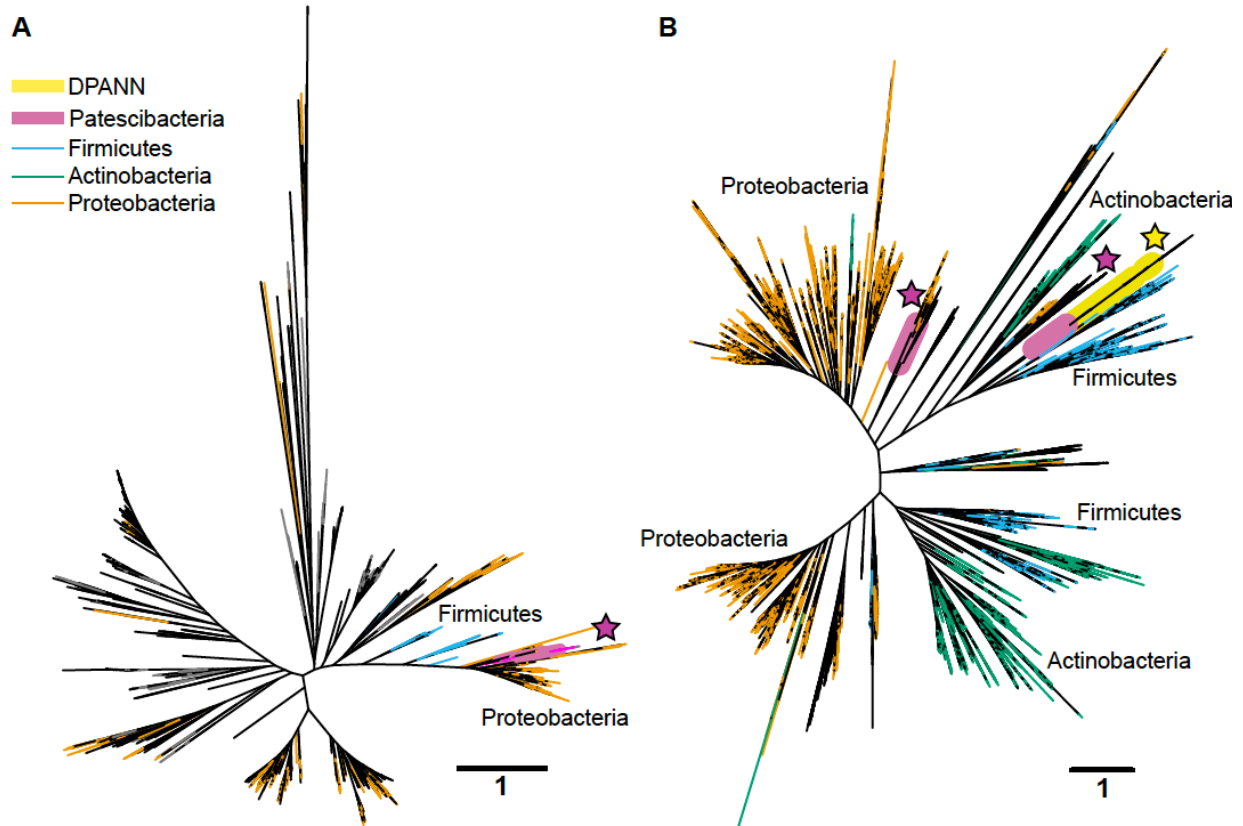

906 **Figure 9.** Maximum likelihood phylogenetic trees of the oxygen-binding subunit I from the  
907 heme copper oxidase (HCO) type A (a) and the A subunit from the bd-ubiquinol (b) oxygen  
908 reductase families. Patescibacteria and DPANN sequences are marked with magenta and yellow  
909 stars, respectively. The Patescibacteria HCO type A sequences (a) are nested within a larger  
910 clade containing mostly Proteobacteria (orange), and the Patescibacteria and DPANN bd-  
911 ubiquinol sequences (b) are nested within Proteobacteria (orange) and Firmicutes (blue)  
912 dominated clades. The scale bar represents the estimated number of substitutions per site

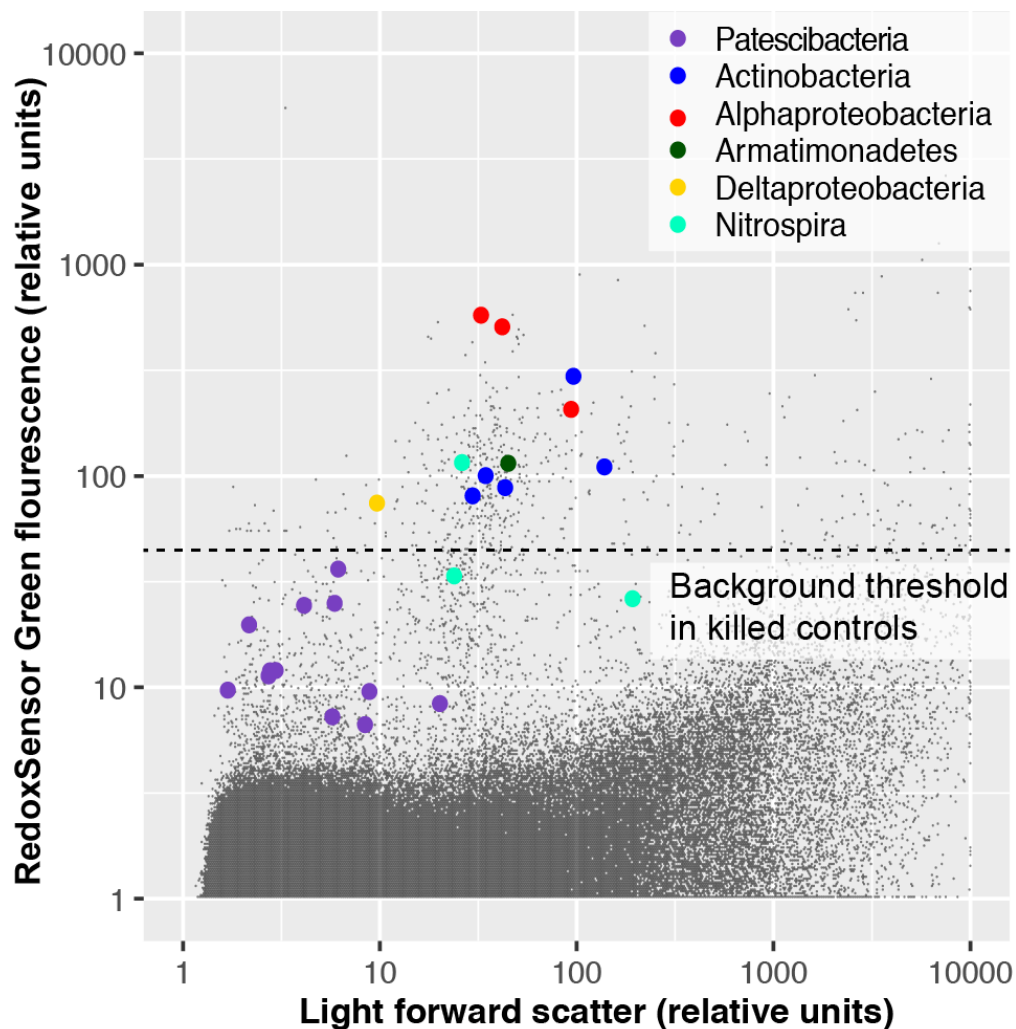

913  
914 **Figure 10.** Oxidoreductase activity in subsurface (~300 m below surface) microbial cells from  
915 Homestake Mine (Lead, South Dakota, USA) measured by RedoxSensor Green (RSG;  
916 ThermoFisher).

917  
918  
919  
920  
921  
922  
923  
924  
925  
926  
927  
928  
929  
930

931 **Supplemental Table Captions**

932

933 **Table S1.** Deep-sequenced and LoCoS SAGs from this study with genomic statistics and  
934 associated environmental metadata. Data are ordered with the following column headers:

935 1=genome; single amplified genome (SAG identifier)

936 2=gold.analysis.id; Gold analysis identifier (used to search genome in IMG/M)

937 3=phylum

938 4=assembly.completeness; checkM completeness estimates

939 5=contamination; checkM estimated genome contamination

940 6=assembly.size; SAG assembly size

941 7=est.genome.size; estimated genome size

942 8=coding.density

943 9=ec1.count; counts of oxidoreductases from SAG assembly

944 10=est.ec1.count; estimated counts of oxidoreductases from predicted genome size of n Mbp

945 11=16s.copy.number; number of predicted 16S rRNA genes

946 12=cell.diameter; estimated cell diameter

947 13=sequencing.center

948 14=sample.collection.site; name of site where samples were collected

949 15=sample.type

950 16=date.collected; sample collection date dd/mm/yy

951 17=latitude

952 18=longitude

953 19=depth

954 20=dissolved.oxygen (micromoles/L)

955 21=ph

956 22=salinity (practical salinity units, psu)

957 23=temperature (degrees Celsius)

958 24=h2s; dissolved hydrogen sulfide (millimoles/L)

959 NA=not applicable

960

961 **Table S2.** Genomes from other studies with associated genomic statistical information (accessed  
962 from IMG/M on April 2018).

963

964 **Table S3.** Potential co-sorted SAGs from deep-sequenced and LoCoS datasets. SAGs can be  
965 cross-referenced for specific information with Table S1.

966

967 **Table S4.** Symbiont genome assemblies and taxonomic names used in Figures 6 and 7.

968

969 **Table S5.** Pairwise Wilcoxon's test p-values on all phyla versus phyla cell diameter estimations  
970 in Figure 5.
